# Supplementary material for: Cost Effectiveness and Budget Impact of Nivolumab Plus Ipilimumab Versus Platinum Plus Pemetrexed (with and Without Bevacizumab) in Patients with Unresectable Malignant Pleural Mesothelioma in Switzerland
Source: PubMed Central journal article supplement — Pharmacoeconomics. 2023 Aug 12;41(12):1641–55. doi: 10.1007/s40273-023-01305-3 (PMC10635986; doi:10.1007/s40273-023-01305-3), 2023-08-12
Supplement: 40273_2023_1305_MOESM1_ESM.pdf [file 40273_2023_1305_MOESM1_ESM.pdf]

# **Cost-effectiveness and budget impact of nivolumab plus ipilimumab versus platinum plus pemetrexed (with and without bevacizumab) in patients with unresectable malignant pleural mesothelioma in Switzerland**

## **Pharmacoeconomics**

Michaela Carla Barbier<sup>1</sup>, Alicia Fengler<sup>2</sup>, Esther Pardo<sup>2</sup>, Arjun Bhadhuri<sup>1</sup>, Niklaus Meier<sup>1</sup>, Oliver Gautschi<sup>2,3</sup>

<sup>1</sup> Institute of Pharmaceutical Medicine (ECPM) / Health Economics Facility, Department of Public Health, University of Basel, Switzerland

<sup>2</sup> Medical Oncology, Cantonal Hospital of Lucerne, Lucerne, Switzerland

<sup>3</sup> University of Bern, Bern, Switzerland

### **Corresponding Author:**

Dr. Michaela Carla Barbier, Institute of Pharmaceutical Medicine (ECPM), University of Basel, Klingelbergstrasse 61, CH-4056 Basel, Switzerland. E-mail: [michaela.barbier@unibas.ch](mailto:michaela.barbier@unibas.ch)

---

## **Electronic Supplementary Appendix**

# Table of contents

|       |                                                                                                             |    |
|-------|-------------------------------------------------------------------------------------------------------------|----|
| 1     | Model structure .....                                                                                       | 6  |
| 2     | Kaplan-Meier OS and PFS re-construction.....                                                                | 8  |
| 3     | Survival curve fitting.....                                                                                 | 10 |
| 3.1   | Hazard functions CM-743.....                                                                                | 10 |
| 3.2   | Suvival curve fitting OS CM-743.....                                                                        | 11 |
| 3.2.1 | Assessing goodness-of-fit of parametric and spline survival models within and outside the trial period..... | 11 |
| 3.2.2 | Selection of base-case distribution for OS CM-743.....                                                      | 15 |
| 3.3   | Survival curve fitting PFS CM-743.....                                                                      | 17 |
| 3.3.1 | Assessing goodness-of-fit of parametric and spline PFS models within and outside the trial period.....      | 17 |
| 3.3.2 | Selection of base-case distribution for PFS CM-743 .....                                                    | 20 |
| 3.4   | Fitted and extrapolated OS and PFS curves for each strategy.....                                            | 22 |
| 3.5   | Survival curve fitting of CM-743 subgroups .....                                                            | 24 |
| 3.5.1 | Epithelioid subtype.....                                                                                    | 24 |
| 3.5.2 | Non-epithelioid subtype.....                                                                                | 25 |
| 4     | Testing of proportional hazards assumption.....                                                             | 26 |
| 4.1   | Testing of proportional hazards assumption OS CM-743 .....                                                  | 26 |
| 4.2   | Testing of proportional hazards assumption PFS CM-743 .....                                                 | 27 |
| 4.3   | Testing of proportional hazards assumption OS MAPS.....                                                     | 28 |
| 4.4   | Testing of proportional hazards assumption PFS MAPS .....                                                   | 29 |
| 5     | Comparison of Kaplan-Meier curves .....                                                                     | 30 |
| 6     | Follow-up treatments .....                                                                                  | 33 |
| 7     | Utilities .....                                                                                             | 35 |
| 8     | Overview input parameters .....                                                                             | 36 |
| 9     | Adverse events.....                                                                                         | 42 |
| 10    | Resource use .....                                                                                          | 44 |

|                              |    |
|------------------------------|----|
| 11 Budget impact .....       | 45 |
| 12 ICER results .....        | 47 |
| 13 Scatterplot results ..... | 52 |
| 14 EVPI .....                | 53 |
| 15 References.....           | 54 |

## List of tables

|                                                                                                    |    |
|----------------------------------------------------------------------------------------------------|----|
| Supplementary Table 1. Goodness-of-fit for nivolumab+ipilimumab.....                               | 11 |
| Supplementary Table 2. Goodness-of-fit for pemetrexed + platin.....                                | 12 |
| Supplementary Table 3. Goodness-of-fit for nivolumab+ipilimumab.....                               | 17 |
| Supplementary Table 4. Goodness-of-fit for pemetrexed + platin.....                                | 18 |
| Supplementary Table 5. Follow-up treatments.....                                                   | 33 |
| Supplementary Table 6. Utility input parameters, Markov state transition model.....                | 35 |
| Supplementary Table 7. Utility input parameters of PD state, partitioned survival model.....       | 35 |
| Supplementary Table 8. Input parameters .....                                                      | 36 |
| Supplementary Table 9. Adverse event occurrences and costs .....                                   | 42 |
| Supplementary Table 10. Resource use .....                                                         | 44 |
| Supplementary Table 11. Market Shares.....                                                         | 45 |
| Supplementary Table 12. Number of MPM incident patients in Switzerland .....                       | 46 |
| Supplementary Table 13. ICER result table.....                                                     | 47 |
| Supplementary Table 14. 5-year budget impact with FU costs of patients from previous years .....   | 50 |
| Supplementary Table 15. 5-year budget impact without FU costs of patients from previous years..... | 51 |

# List of figures

|                                                                                                                              |    |
|------------------------------------------------------------------------------------------------------------------------------|----|
| Supplementary Fig. 1 Base Case Markov State Transition Model.....                                                            | 6  |
| Supplementary Fig. 2 First scenario Analysis Markov State Transition Model.....                                              | 7  |
| Supplementary Fig. 3 Re-construction of OS KM curves in CM-743 (4-year data).....                                            | 8  |
| Supplementary Fig. 4 Re-construction of OS KM curves in MAPS.....                                                            | 8  |
| Supplementary Fig. 5 Re-construction of PFS KM curves in CM-743 (3-year data).....                                           | 9  |
| Supplementary Fig. 6 Re-construction of PFS KM curves in MAPS.....                                                           | 9  |
| Supplementary Fig. 7 Smoothed hazard functions for CM-743 digitized overall survival data.                                   | 10 |
| Supplementary Fig. 8 Smoothed hazard functions for CM-743 digitized progression-free survival data.....                      | 10 |
| Supplementary Fig. 9 Parametric fit and extrapolation of OS under nivolumab+ipilimumab, digitized data of CM-743.....        | 12 |
| Supplementary Fig. 10 Spline function fit and extrapolation of OS under nivolumab+ipilimumab, digitized data of CM-743.....  | 13 |
| Supplementary Fig. 11 Parametric fit and extrapolation of OS under pemetrexed+platin, digitized data from CM-743.....        | 14 |
| Supplementary Fig. 12 Spline function fit and extrapolation of OS under pemetrexed+platin, digitized data from CM-743.....   | 15 |
| Supplementary Fig. 13 Overall survival estimation (CM-743).....                                                              | 16 |
| Supplementary Fig. 14 Parametric fit and extrapolation of PFS under nivolumab+ipilimumab, digitized data of CM-743.....      | 18 |
| Supplementary Fig. 15 Spline function fit and extrapolation of PFS under nivolumab+ipilimumab, digitized data of CM-743..... | 19 |
| Supplementary Fig. 16 Parametric fit and extrapolation of PFS under pemetrexed+platin, digitized data of CM-743.....         | 19 |
| Supplementary Fig. 17 Spline function fit and extrapolation of PFS under pemetrexed+platin, digitized data of CM-743.....    | 20 |
| Supplementary Fig. 18 Progression-free survival estimation.....                                                              | 21 |
| Supplementary Fig. 19 Fitted and extrapolated OS and PFS curves for nivolumab+ipilimumab strategy.....                       | 22 |
| Supplementary Fig. 20 Fitted and extrapolated OS and PFS curves for pemetrexed+platin strategy.....                          | 22 |
| Supplementary Fig. 21 Fitted and extrapolated OS and PFS curves for pemetrexed+platin+bevacizumab strategy.....              | 23 |
| Supplementary Fig. 22 Overall survival estimation, epithelioid subtype.....                                                  | 24 |
| Supplementary Fig. 23 Progression-free survival estimation, epithelioid subtype.....                                         | 24 |
| Supplementary Fig. 24 Overall survival estimation, non-epithelioid subtype.....                                              | 25 |
| Supplementary Fig. 25 Progression-free survival estimation, non-epithelioid subtype.....                                     | 25 |

|                                                                                                                                                                                 |    |
|---------------------------------------------------------------------------------------------------------------------------------------------------------------------------------|----|
| Supplementary Fig. 26 Proportional hazard plots OS CM-743.....                                                                                                                  | 26 |
| Supplementary Fig. 27 Proportional hazard plots PFS CM-743.....                                                                                                                 | 27 |
| Supplementary Fig. 28 Proportional hazard plots OS MAPS .....                                                                                                                   | 28 |
| Supplementary Fig. 29 Proportional hazard plots PFS CM-743.....                                                                                                                 | 29 |
| Supplementary Fig. 30 Recreated OS KM estimates of CM-743 and MAPS .....                                                                                                        | 30 |
| Supplementary Fig. 31 Recreated OS KM estimates of CM-743 and HR-based MAPS<br>pem+platin+beva estimates .....                                                                  | 31 |
| Supplementary Fig. 32 Recreated PFS KM estimates of CM-743 and MAPS.....                                                                                                        | 32 |
| Supplementary Fig. 33 Recreated PFS KM estimates of CM-743 and HR-based MAPS<br>pem+platin+beva estimates .....                                                                 | 32 |
| Supplementary Fig. 34 Cost-effectiveness plane (TreeAge output).....                                                                                                            | 52 |
| Supplementary Fig. 35 EVPI for an individual patient. <i>EVPI</i> expected value of perfect<br>information, <i>WTP</i> willingness-to-pay .....                                 | 53 |
| Supplementary Fig. 36 EVPI for the Swiss population. <i>CHF</i> Swiss Francs, <i>EVPI</i> expected<br>value of perfect information, <i>QALY</i> Quality-adjusted life-year..... | 53 |

# 1 Model structure

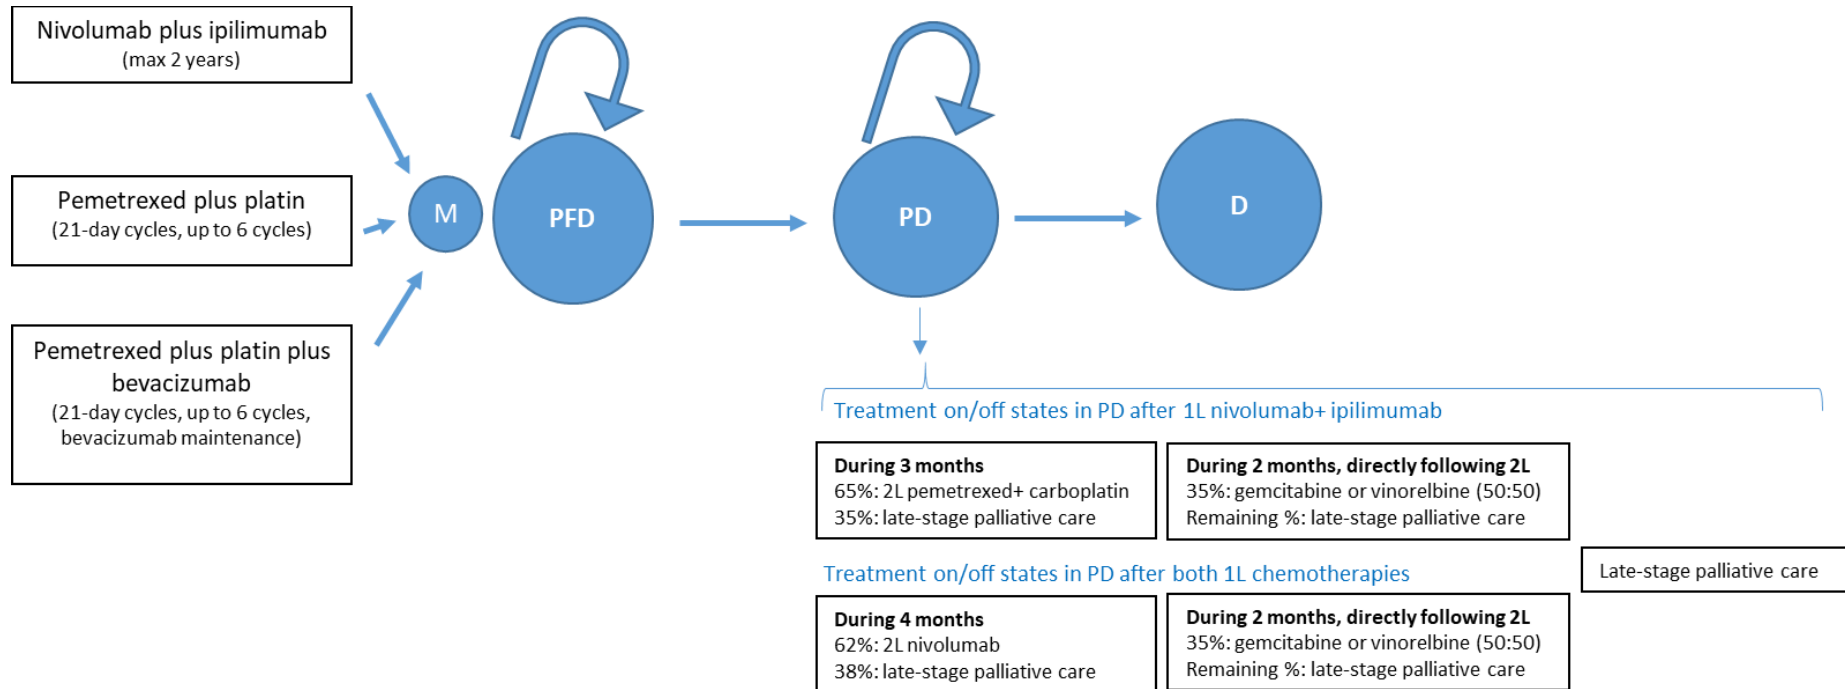

**Supplementary Fig. 1 Base Case Markov State Transition Model**

*D* death, *M* Markov node, *P* Probability, *PD* progressed disease, *PFD* Progression-free disease

Complementary note: In the base case, all patients were assumed to progress and no patient was assumed to die before progression, so the conditional probability  $P(\text{death}/\text{PFD})$  was 0.

In the well-known conditional probability formula,  $P(\text{death})$  simplifies in this case to  $P(\text{death}/\text{PD}) \cdot P(\text{PD})$ , and hence  $P(\text{death}/\text{PD}) = \frac{P(\text{death})}{P(\text{PD})}$ .

The transition probability of the event of interest  $tp(t, t+1) = 1 - \frac{S(t+1)}{S(t)}$  [1] (with  $S(t) = P(T>t)$  at timepoint  $t$ ) from PD to D cannot be calculated exactly only based on the overall survival (OS) and the progression-free survival (PFS) curve. Published OS curves are a weighted average of OS curves of the probability of death for both healthy and sick persons [2]. We approximated the transition probability from PD to D with the OS curve adjusted by the proportion of progressed patients among those still alive  $(1 - \frac{S_{PFS}(t)}{S_{OS}(t)})$ . In case parts of the fitted and extrapolated PFS curve were equal or above the OS curve, we replaced the probability of being progression-free at timepoints  $(t)$  with the probability of being alive at timepoints  $t+1$ . With this proceeding we kept the PFS curve below the OS curve.

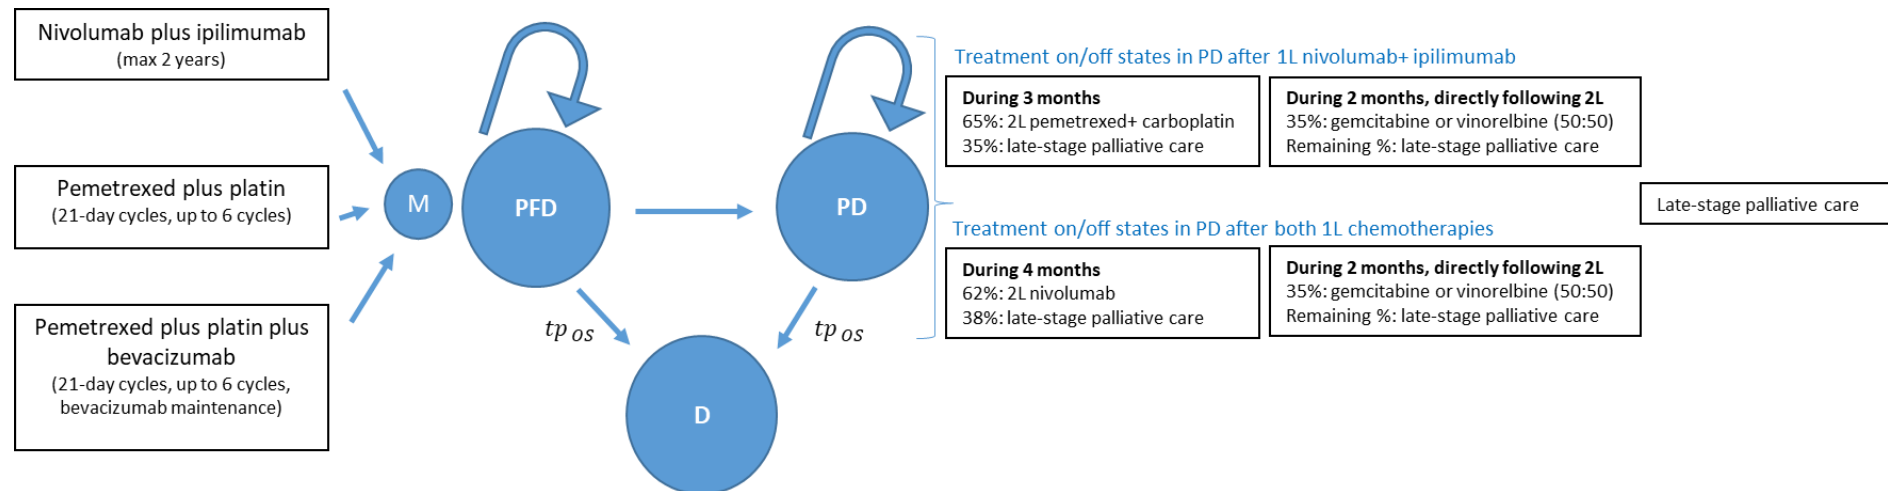

### Supplementary Fig. 2 First scenario Analysis Markov State Transition Model

*D* death, *M* Markov node, *PD* progressed disease, *PFD* Progression-free disease, *tp* transition probability

Complementary notes:

In this first scenario, the probability of dying from the PFD state is assumed to be the same as from the PD state.

In case the PFS curve is equal or above the OS curve, no patient progresses and the transition probability from PFD to PD is set to 0.

## 2 Kaplan-Meier OS and PFS re-construction

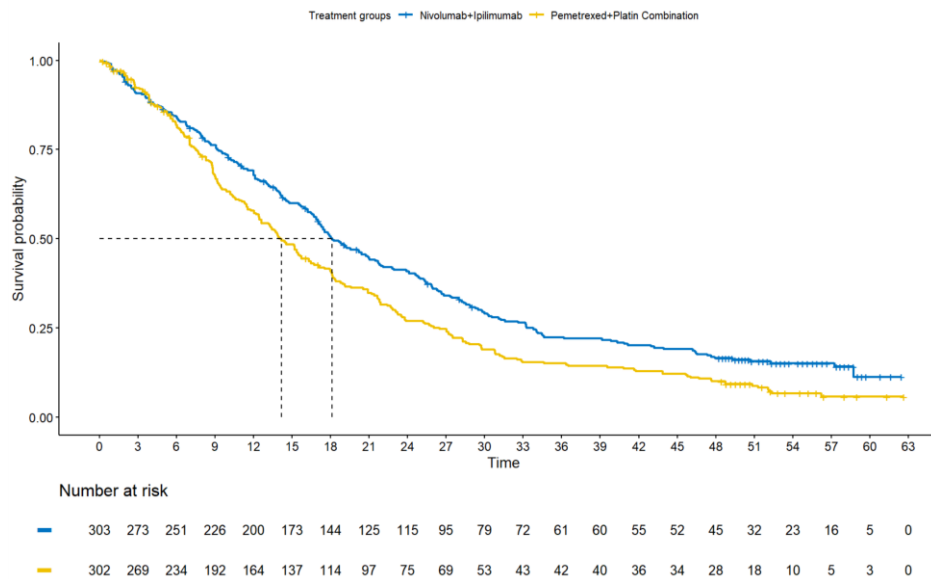

**Supplementary Fig. 3 Re-construction of OS KM curves in CM-743 (4-year data)**

|                                            | n   | events | median                                           | 0.95LCL | 0.95UCL |                                                 |
|--------------------------------------------|-----|--------|--------------------------------------------------|---------|---------|-------------------------------------------------|
| Arm=Nivo+ipi                               | 303 | 246    | 18.1                                             | 17.0    | 21.5    | (median OS of original graph: 18.1[16.8, 21.0]) |
| Arm=Pem+platin                             | 302 | 263    | 14.2                                             | 12.6    | 16.5    | (median OS of original graph: 14.1[12.4,16.3])  |
| Unadjusted hazard ratio: 0.74 [0.62, 0.88] |     |        | (adjusted HR of original graph: 0.73[0.61,0.87]) |         |         |                                                 |

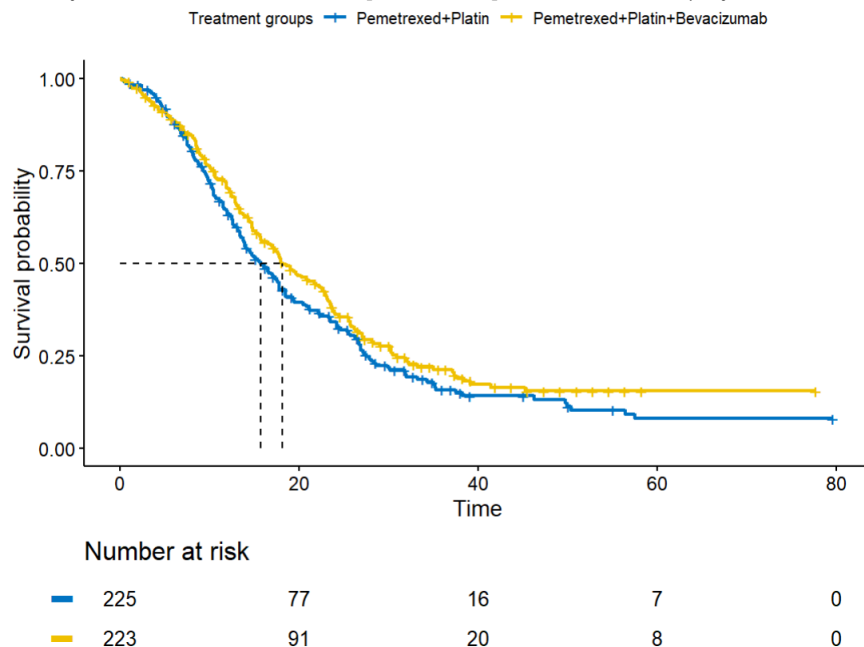

**Supplementary Fig. 4 Re-construction of OS KM curves in MAPS**

|                                           | n   | events | median                                                                                   | 0.95LCL | 0.95UCL |                                                  |
|-------------------------------------------|-----|--------|------------------------------------------------------------------------------------------|---------|---------|--------------------------------------------------|
| Arm=Pem+platin                            | 225 | 178    | 15.8                                                                                     | 13.8    | 18.5    | (median OS of original graph: 16.1 [14.0, 17.9]) |
| Arm=Triple arm                            | 223 | 164    | 18.2                                                                                     | 15.7    | 22.6    | (median OS of original graph: 18.8 [15.9, 22.6]) |
| Unadjusted hazard ratio: 0.84 [0.68,1.04] |     |        | (adjusted HR of original graph: 0.77 [0.62,0.95]; adjustment for minimisation variables) |         |         |                                                  |



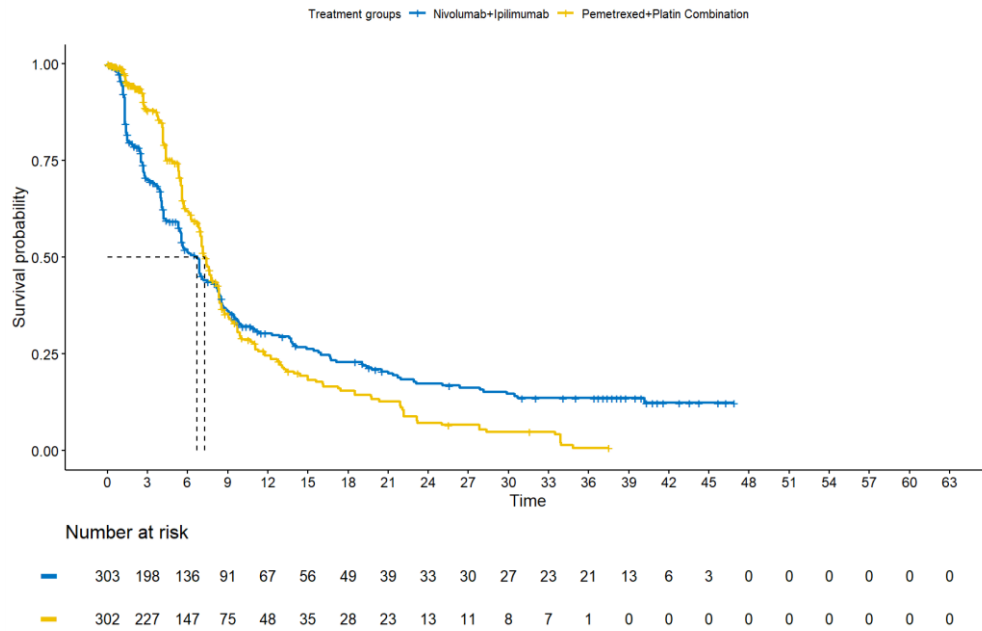

**Supplementary Fig. 5** Re-construction of PFS KM curves in CM-743 (3-year data)

|                                            | n   | events | median | 0.95LCL | 0.95UCL |                                                        |
|--------------------------------------------|-----|--------|--------|---------|---------|--------------------------------------------------------|
| Arm=Nivo+ipi                               | 303 | 227    | 6.70   | 5.53    | 7.44    | (median PFS 4-year original data: 6.8)                 |
| Arm=Pem+plating                            | 302 | 221    | 7.28   | 6.94    | 8.21    | (median PFS 4-year original data: 7.2)                 |
| Unadjusted hazard ratio: 0.94 [0.78, 1.13] |     |        |        |         |         | (adjusted HR of 4-year original data: 0.93[0.77-1.13]) |

No 4-year PFS curve is currently published [3]. Only statistics were available as presented in the previous lines.

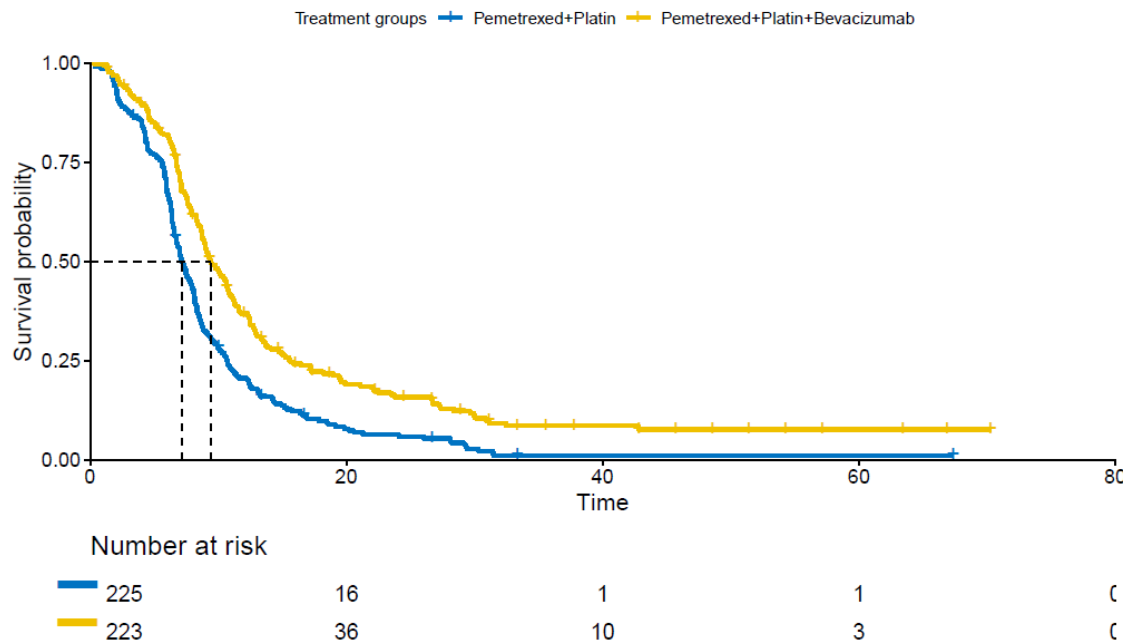

**Supplementary Fig. 6** Re-construction of PFS KM curves in MAPS

|                                  | n   | events | median | 0.95LCL | 0.95UCL |                                                                                          |
|----------------------------------|-----|--------|--------|---------|---------|------------------------------------------------------------------------------------------|
| Arm= Pem+Platin                  | 225 | 217    | 7.18   | 6.72    | 8.05    | (median PFS original data: 7.3 [6.7, 8.0])                                               |
| Arm= Triple arm                  | 223 | 192    | 9.40   | 8.76    | 10.77   | (median PFS original data: 9.2 [8.5, 10.5])                                              |
| Unadjusted HR: 0.60 [0.49, 0.73] |     |        |        |         |         | (adjusted HR of original graph: 0.61 [0.50,0.75]; adjustment for minimisation variables) |

### 3 Survival curve fitting

#### 3.1 Hazard functions CM-743

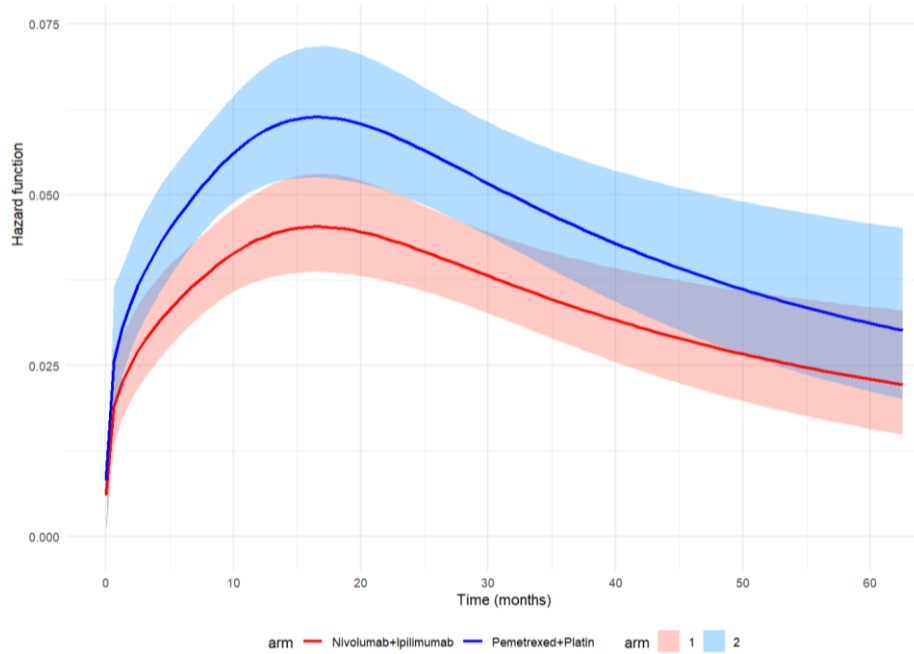

Supplementary Fig. 7 Smoothed hazard functions for CM-743 digitized overall survival data

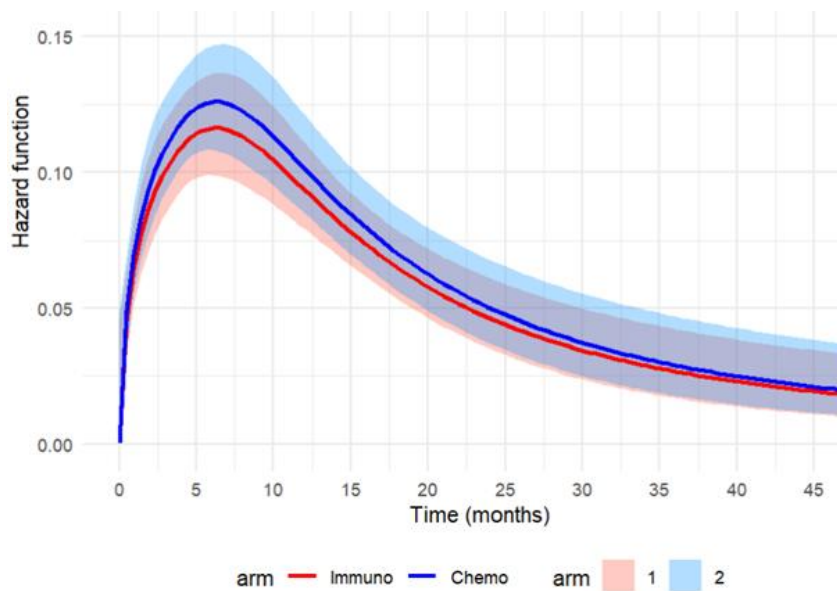

Supplementary Fig. 8 Smoothed hazard functions for CM-743 digitized progression-free survival data

## 3.2 Survival curve fitting OS CM-743

In a first step we verified that the hazard functions of possible distributions/functions are first increasing and then decreasing. Out of the ones with a hazard function in line with our criteria, we then selected distributions/functions that had lowest possible AIC and BIC and a long-term estimation at 10 years at 2% for nivolumab+ipilimumab and 0% for pemetrexed+platin. This was based on our clinical expectation and in line with a UK expert group expecting 5-year survival at 5%, 7.5-year survival at 2%, and 10-year survival at 0-2% with current treatments in the UK [4].

### 3.2.1 Assessing goodness-of-fit of parametric and spline survival models within and outside the trial period

**Supplementary Table 1.** Goodness-of-fit for nivolumab+ipilimumab

| Distributions/<br>Functions | Hazard<br>function <sup>a</sup> | AIC      | BIC      | Long term<br>estimation at 10<br>years <sup>b</sup> |
|-----------------------------|---------------------------------|----------|----------|-----------------------------------------------------|
| Exponential                 | No                              | 2126.634 | 2134.062 | NA                                                  |
| Weibull                     | No                              | 2124.491 | 2131.918 | 0.8%                                                |
| Log-normal                  | Yes                             | 2135.552 | 2142.98  | 5.5%                                                |
| Log-logistic                | Yes                             | 2123.23  | 2130.657 | 5.6%                                                |
| Gompertz                    | No                              | 2126.634 | 2134.061 | 1.3%                                                |
| Gamma                       | No                              | 2123.417 | 2130.844 | 1.7%                                                |
| GenGamma                    | No                              | 2123.242 | 2134.383 | 0.8%                                                |
| Spline Odds 1 knot          | Yes                             | 2120.637 | 2131.778 | 4.1%                                                |
| Spline Odds 2 knots         | Yes                             | 2122.661 | 2137.516 | 3.4%                                                |
| Spline Hazard 1 knot        | No                              | 2124.091 | 2135.232 | 1.3%                                                |
| Spline Hazard 2 knots       | Yes                             | 2122.472 | 2137.327 | 2.5%                                                |
| <b>Spline Normal 1 knot</b> | Yes                             | 2121.397 | 2132.538 | 2.7%                                                |
| Spline Normal 2 knots       | Yes                             | 2123.465 | 2138.32  | 2.9%                                                |

<sup>a</sup> First increasing and then decreasing

<sup>b</sup> Clinical expectation of 2% at 10-years (own clinical assumption and in line with [4] page 81/481)

AIC Akaike information criteria, BIC Bayesian information criteria, NA not applicable

**Supplementary Table 2.** Goodness-of-fit for pemetrexed + platin

| Distributions/<br>Functions | Hazard<br>function <sup>a</sup> | AIC             | BIC             | Long term estimation at 10<br>years <sup>b</sup> |
|-----------------------------|---------------------------------|-----------------|-----------------|--------------------------------------------------|
| Exponential                 | No                              | 2120.508        | 2124.218        | 0.3%                                             |
| Weibull                     | No                              | 2114.394        | 2121.815        | 0.1%                                             |
| Log-normal                  | Yes                             | 2121.658        | 2129.079        | 2%                                               |
| Log-logistic                | Yes                             | 2106.009        | 2113.43         | 2.4%                                             |
| Gompertz                    | No                              | 2121.923        | 2129.344        | 0.1%                                             |
| Gamma                       | No                              | 2110.856        | 2118.277        | 0.1%                                             |
| GenGamma                    | No                              | 2108.412        | 2119.544        | 0.4%                                             |
| Spline Odds 1 knot          | Yes                             | 2104.453        | 2115.584        | 1.7%                                             |
| Spline Odds 2 knots         | Yes                             | 2106.425        | 2121.267        | 1.7%                                             |
| Spline Hazard 1 knot        | No                              | 2108.519        | 2119.651        | 0.3%                                             |
| Spline Hazard 2 knots       | Yes                             | 2106.568        | 2121.409        | 0.7%                                             |
| <b>Spline Normal 1 knot</b> | <b>Yes</b>                      | <b>2106.222</b> | <b>2117.353</b> | <b>0.7%</b>                                      |
| Spline Normal 2 knots       | Yes                             | 2106.341        | 2121.183        | 1.0%                                             |

<sup>a</sup> First increasing and then decreasing

<sup>b</sup> Clinical expectation at 10-year of 0% (own clinical assumption and in line with [4])

AIC Akaike information criteria, BIC Bayesian information criteria

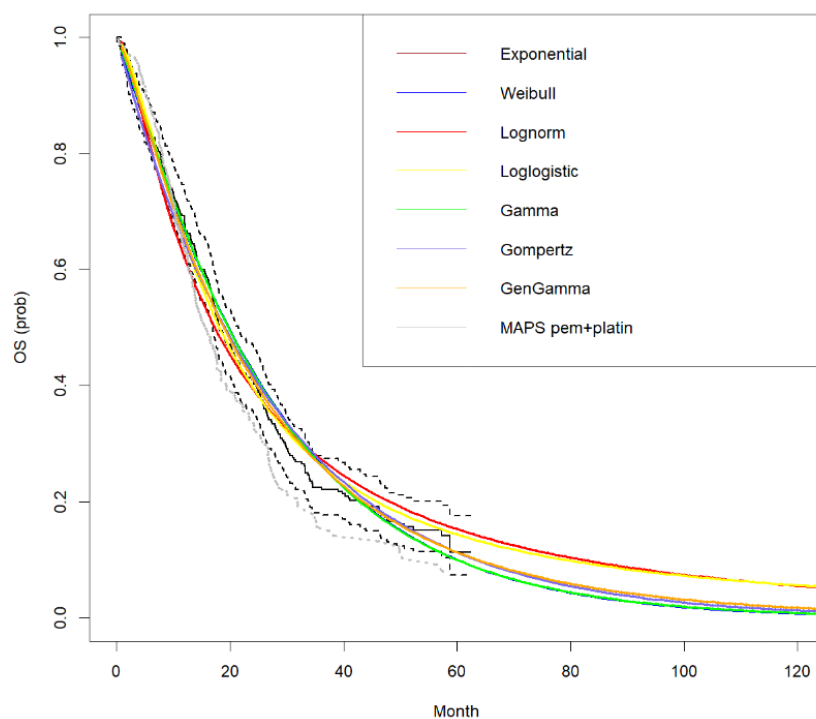

**Supplementary Fig. 9** Parametric fit and extrapolation of OS under nivolumab+ipilimumab, digitized data of CM-743

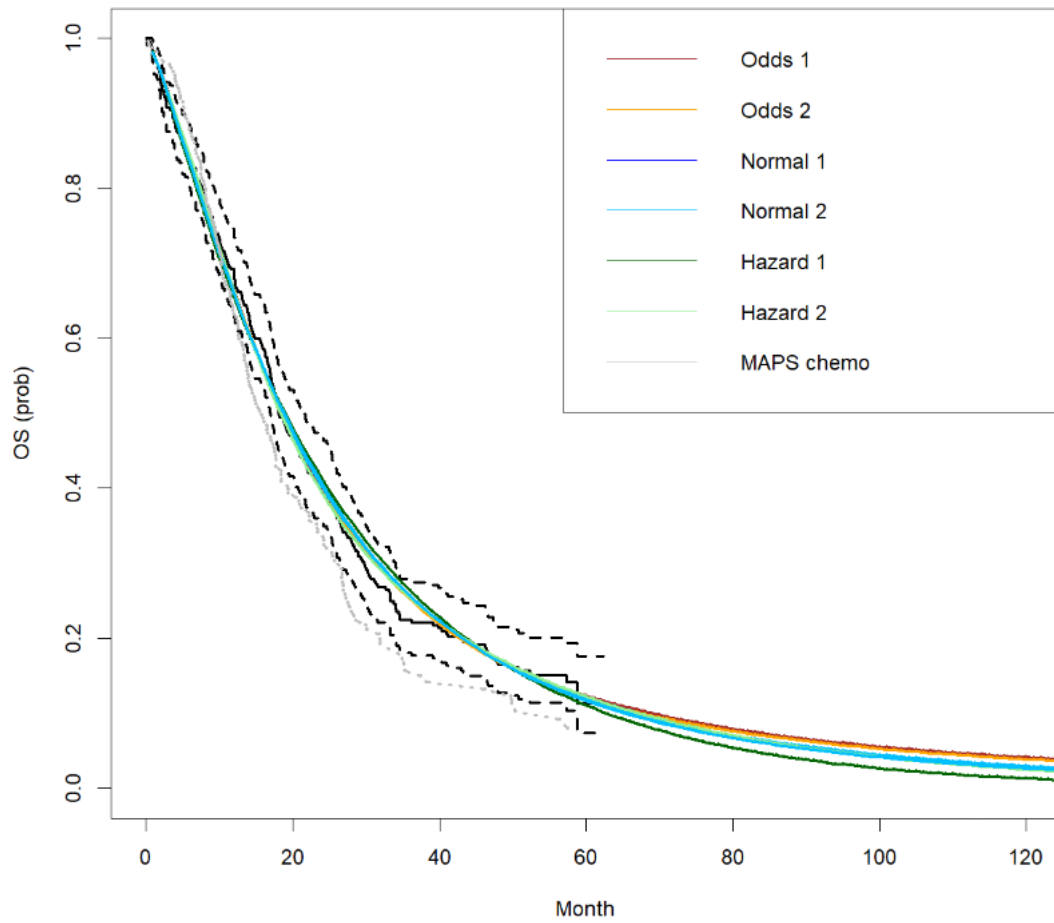

**Supplementary Fig. 10** Spline function fit and extrapolation of OS under nivolumab+ipilimumab, digitized data of CM-743

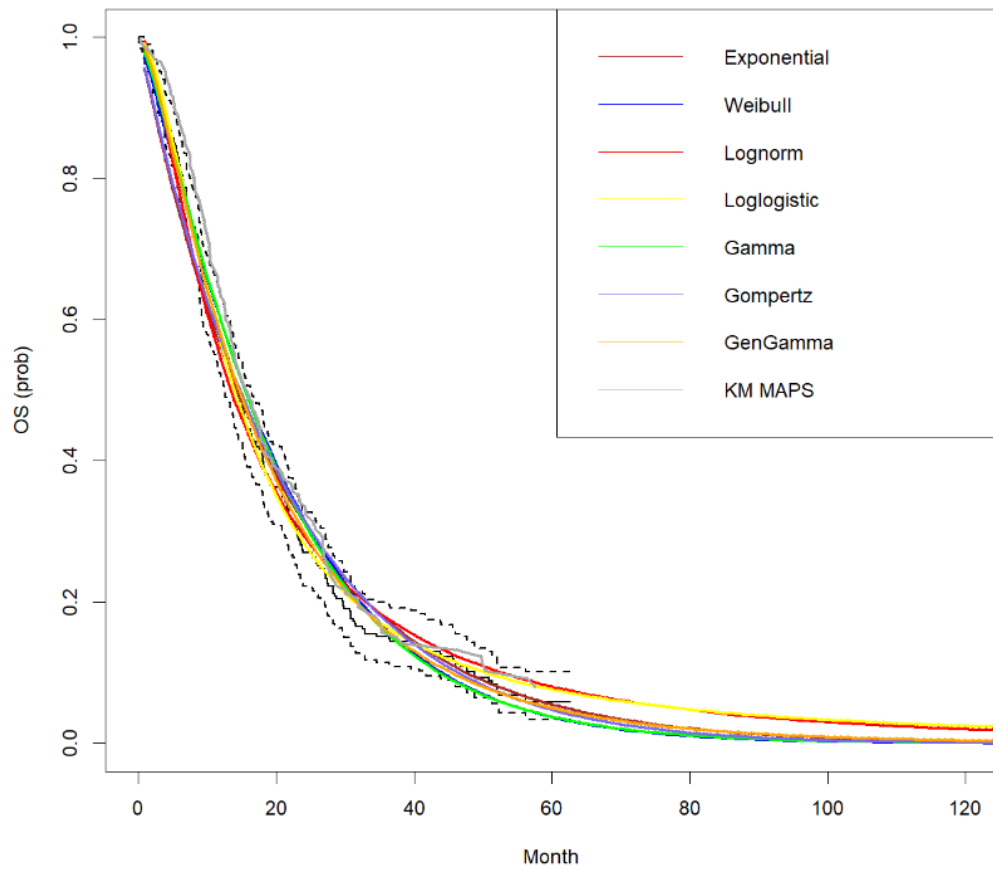

**Supplementary Fig. 11 Parametric fit and extrapolation of OS under pemetrexed+platin, digitized data from CM-743**

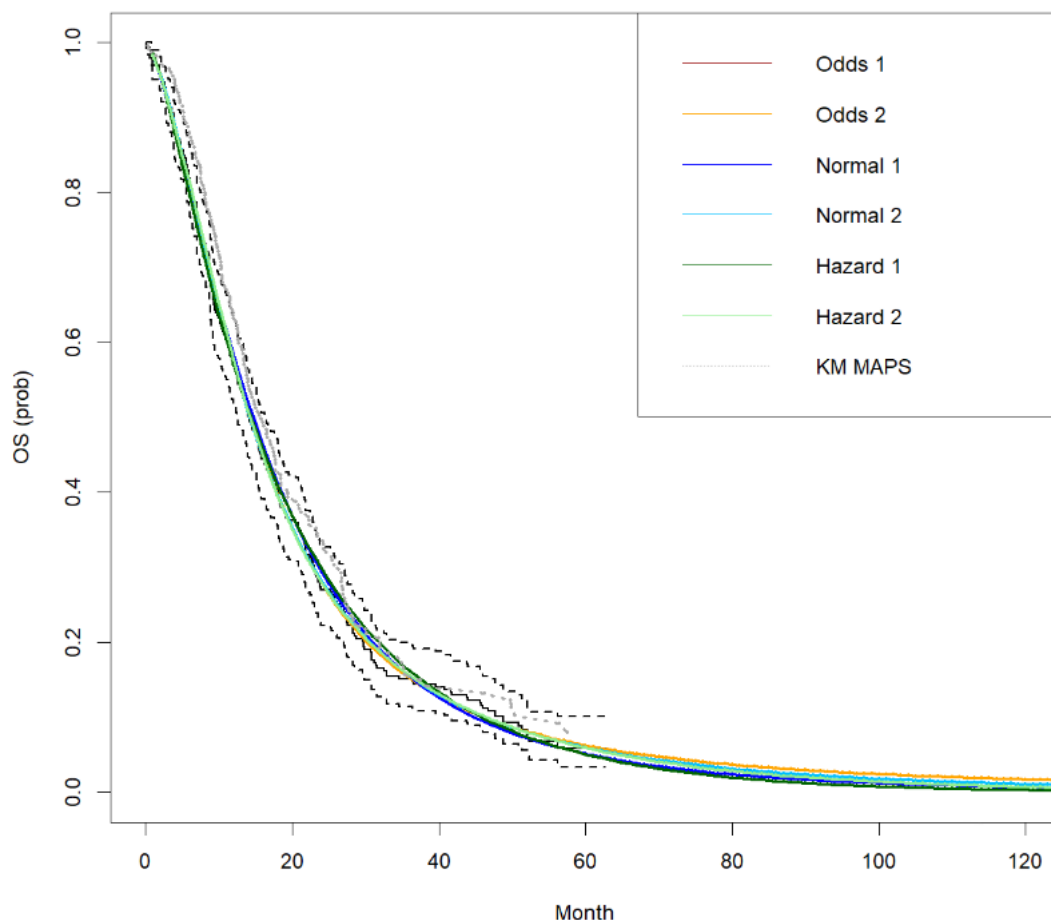

**Supplementary Fig. 12 Spline function fit and extrapolation of OS under pemetrexed+platin, digitized data from CM-743**

**3.2.2 Selection of base-case distribution for OS CM-743**

Taking all selection criteria into account, we selected a **spline normal 1 knot** function for the pemetrexed+platin arm of CM-743. We decided against a log-logistic distribution or spline odds functions since their predicted 10-year survival would have been higher than the clinical expectations for OS as outline in the NICE submission [5].

For the nivolumab+ipilimumab arm, all extrapolations with parametric distributions and spline functions led to a slightly lower OS during the first few months than the OS of the MAPS chemotherapy arm. An optimal selection was hence not possible. Taking all selection criteria into account and the fact that a normal 1 knot function had been selected for the chemotherapy arm, we also selected a **spline normal 1 knot** function to fit and extrapolate the KM OS curve for nivolumab+ipilimumab. Supplementary Fig. 13 visualizes the selected base-case distribution for OS CM-743.

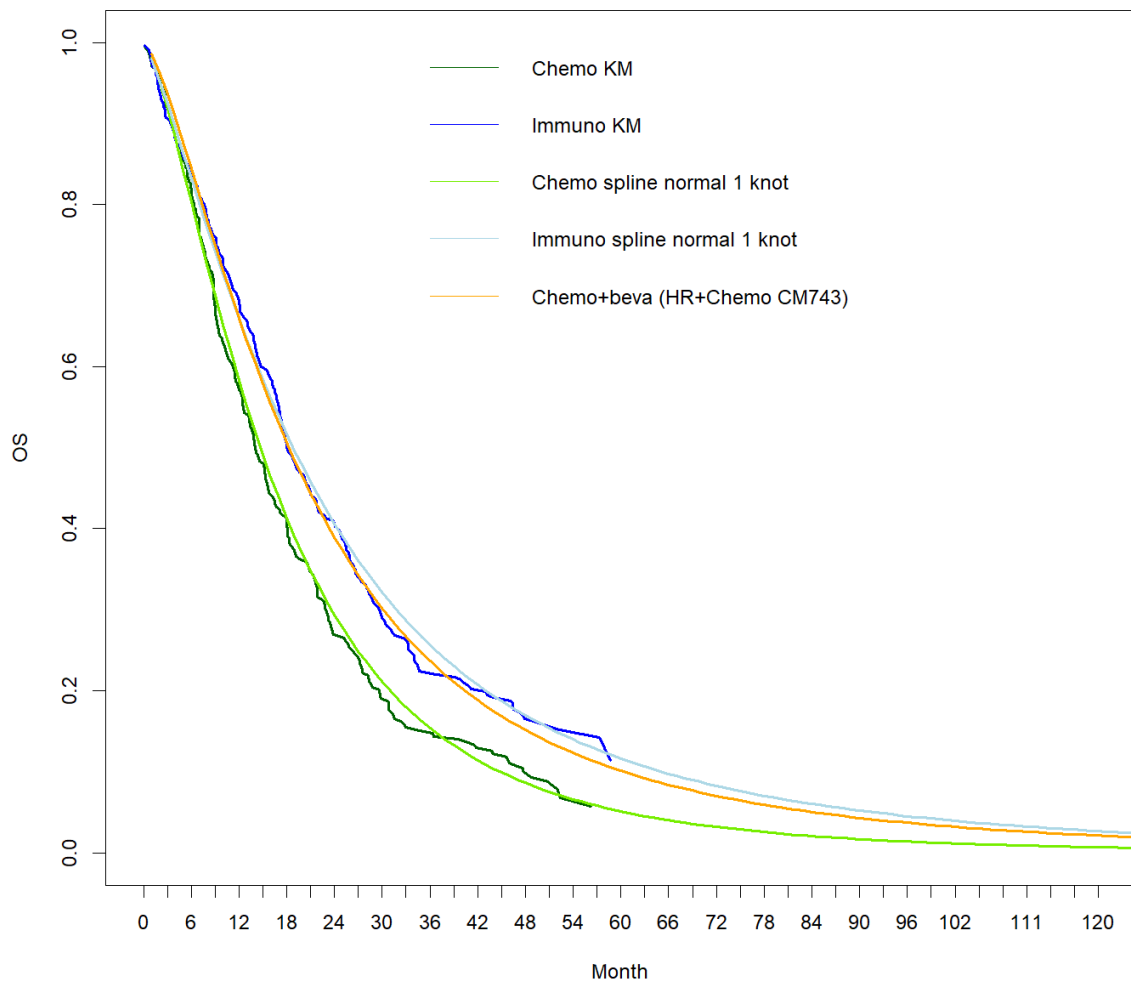

**Supplementary Fig. 13 Overall survival estimation (CM-743).**

*Beva* bevacizumab, *chemo* chemotherapy, *CM743* Checkmate-743 trial, *HR* hazard ratio, *immuno* immunotherapy, *KM* Kaplan Meier, *OS* Overall survival



### 3.3 Survival curve fitting PFS CM-743

For the survival modelling of the PFS curves, we also verified in a first step that the hazard functions of possible distributions/functions are first increasing and then decreasing. Out of the ones with a hazard function in line with our criteria, we then selected distributions/functions that had lowest possible AIC and BIC, and a 4-year estimation at 9% for nivolumab+ipilimumab, and 0% for pemetrexed+platin. 4-year PFS estimates are published and are therefore available [3], but no PFS curves based on 4-year follow-up data.

#### 3.3.1 Assessing goodness-of-fit of parametric and spline PFS models within and outside the trial period

**Supplementary Table 3.** Goodness-of-fit for nivolumab+ipilimumab

| Distributions/<br>Functions | Hazard<br>function <sup>a</sup> | AIC      | BIC      | Estimation at<br>year 4 <sup>b</sup> |
|-----------------------------|---------------------------------|----------|----------|--------------------------------------|
| Exponential                 | Not ok                          | 1604.478 | 1611.906 | 2.15%                                |
| Weibull                     | Not ok                          | 1590.351 | 1597.778 | 4.3%                                 |
| Log-normal                  | Ok                              | 1549.012 | 1556.439 | 7.2%                                 |
| Log-logistic                | Ok                              | 1549.022 | 1556.449 | 7.1%                                 |
| Gompertz                    | Not ok                          | 1556.251 | 1563.678 | 11.4%                                |
| Gamma                       | Not ok                          | 1598.381 | 1605.808 | 3.2%                                 |
| GenGamma                    | Ok                              | 1550.105 | 1561.246 | 8%                                   |
| Spline Odds 1 knot          | Ok                              | 1542.043 | 1553.185 | 10.4%                                |
| Spline Odds 2 knots         | Ok                              | 1543.516 | 1558.371 | 10.0%                                |
| Spline Hazard 1 knot        | Ok                              | 1543.255 | 1554.396 | 10.2%                                |
| Spline Hazard 2 knots       | Ok                              | 1544.633 | 1559.487 | 10.4%                                |
| <b>Spline Normal 1 knot</b> | Ok                              | 1549.24  | 1560.381 | 8.5%                                 |
| Spline Normal 2 knots       | Ok                              | 1546.841 | 1561.696 | 10.4%                                |

<sup>a</sup> Assumption: first sharply increasing and then decreasing over time

<sup>b</sup> Assumption: 9% at 4 years based on Zalcmann et al. ESMO presentation [3]

AIC Akaike information criteria, BIC Bayesian information criteria, y year

**Supplementary Table 4. Goodness-of-fit for pemetrexed + platin**

| Distributions/<br>Functions  | Hazard<br>function* | AIC      | BIC      | Long term estimation at<br>year 4** |
|------------------------------|---------------------|----------|----------|-------------------------------------|
| Exponential                  | Not ok              | 1485.175 | 1488.886 | 1.1%                                |
| Weibull                      | Not ok              | 1449.803 | 1457.224 | 0%                                  |
| Log-normal                   | ok                  | 1446.413 | 1453.834 | 1.4%                                |
| Log-logistic                 | ok                  | 1426.604 | 1434.024 | 1.6%                                |
| Gompertz                     | Not ok              | 1476.735 | 1484.156 | 0%                                  |
| Gamma                        | Not ok              | 1439.06  | 1446.481 | 0.1%                                |
| GenGamma                     | Not ok              | 1435.971 | 1447.103 | 0.3%                                |
| Spline Odds 1 knot           | ok                  | 1426.7   | 1437.8   | 1.1%                                |
| Spline Odds 2 knots          | ok                  | 1423.9   | 1438.741 | 1.9%                                |
| Spline Hazard 1 knot         | Not ok              | 1432.999 | 1444.13  | 0.5%                                |
| <b>Spline Hazard 2 knots</b> | ok                  | 1423.13  | 1437.972 | 1.2%                                |
| Spline Normal 1 knot         | Not ok              | 1433.164 | 1444.295 | 0.4%                                |
| Spline Normal 2 knots        | ok                  | 1422.879 | 1437.721 | 1.4%                                |

<sup>a</sup> Assumption: first sharply increasing and then decreasing over time

<sup>b</sup> Assumption: 0% at 4 years based on Zalcman et al. ESMO presentation [3]

AIC Akaike information criteria, BIC Bayesian information criteria, y year

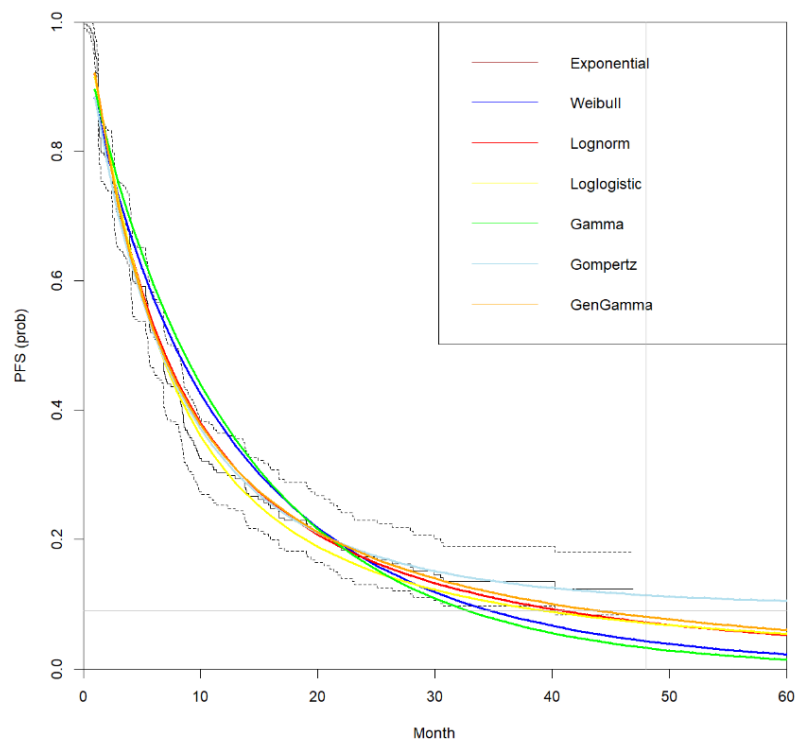

**Supplementary Fig. 14 Parametric fit and extrapolation of PFS under nivolumab+ipilimumab, digitized data of CM-743**

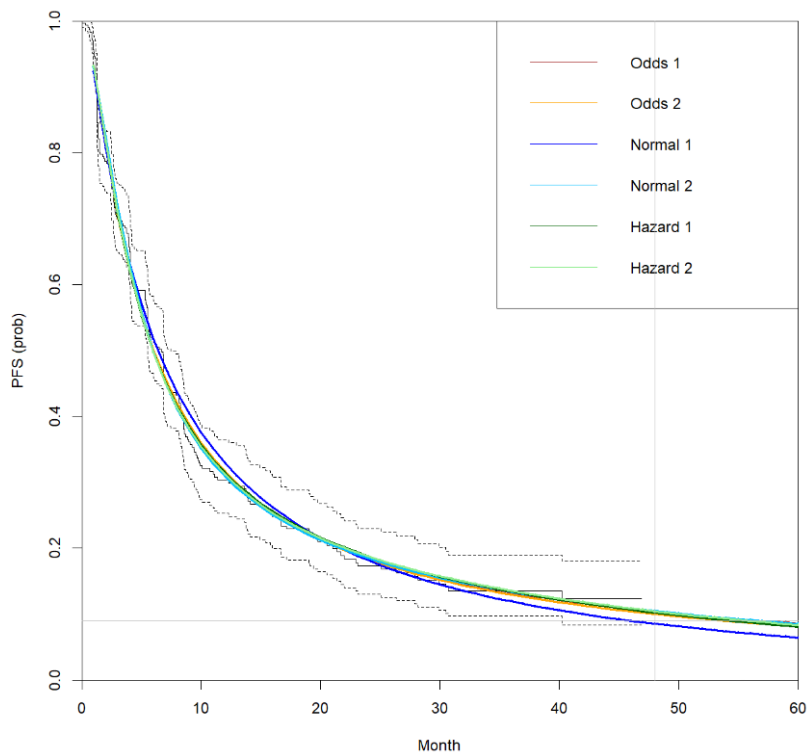

**Supplementary Fig. 15 Spline function fit and extrapolation of PFS under nivolumab+ipilimumab, digitized data of CM-743**

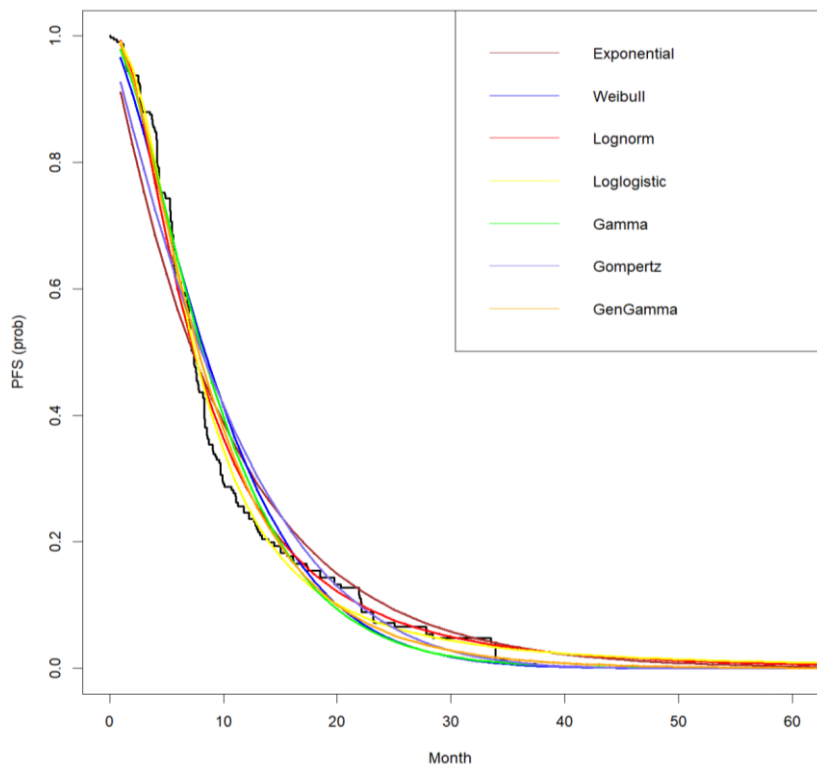

**Supplementary Fig. 16 Parametric fit and extrapolation of PFS under pemetrexed+platin, digitized data of CM-743**

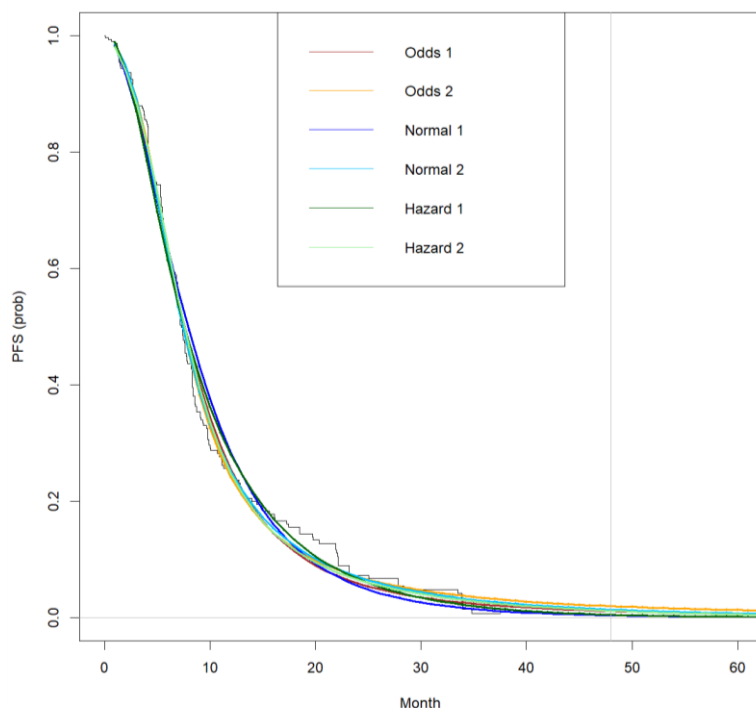

**Supplementary Fig. 17 Spline function fit and extrapolation of PFS under pemetrexed+platin, digitized data of CM-743**

### 3.3.2 Selection of base-case distribution for PFS CM-743

Taking all selection criteria into account, we selected a **spline hazard 2 knots** function for the pemetrexed+platin arm of CM-743 but several other functions were almost as good. The log-logistic and the spline normal 2 knots distributions obtained the lowest BIC and AIC values respectively, but higher 4-year PFS percentages of 1.6% and 1.4% (4-year PFS of 0% was reported by Zalcman et al. [3]). We did not select the spline odds 1 knot neither although it obtained the lowest 4-year PFS of 1.1%. Its predicted PFS was lower than the PFS in the MAPS chemotherapy arm in the range of 24 to 28 months.

For the nivolumab+ipilimumab arm, the spline odds 1 knot function achieved the lowest AIC and BIC values for the re-created KM data. All parametric distributions led to higher AIC/BIC values. All spline models and three parametric distributions (loglogistic, lognormal, generalised gamma) yielded hazard functions with a similar behaviour than the hazard function of the re-created individual patient data. The **spline normal 1 knot** obtained the closest predicted PFS of 8.5% at 4years (4y PFS rates of 9% reported [3]) and was in line with the selected distribution for OS under nivolumab+ipilimumab. Supplementary Fig. 18 visualizes the selected base-case distribution for PFS CM-743.

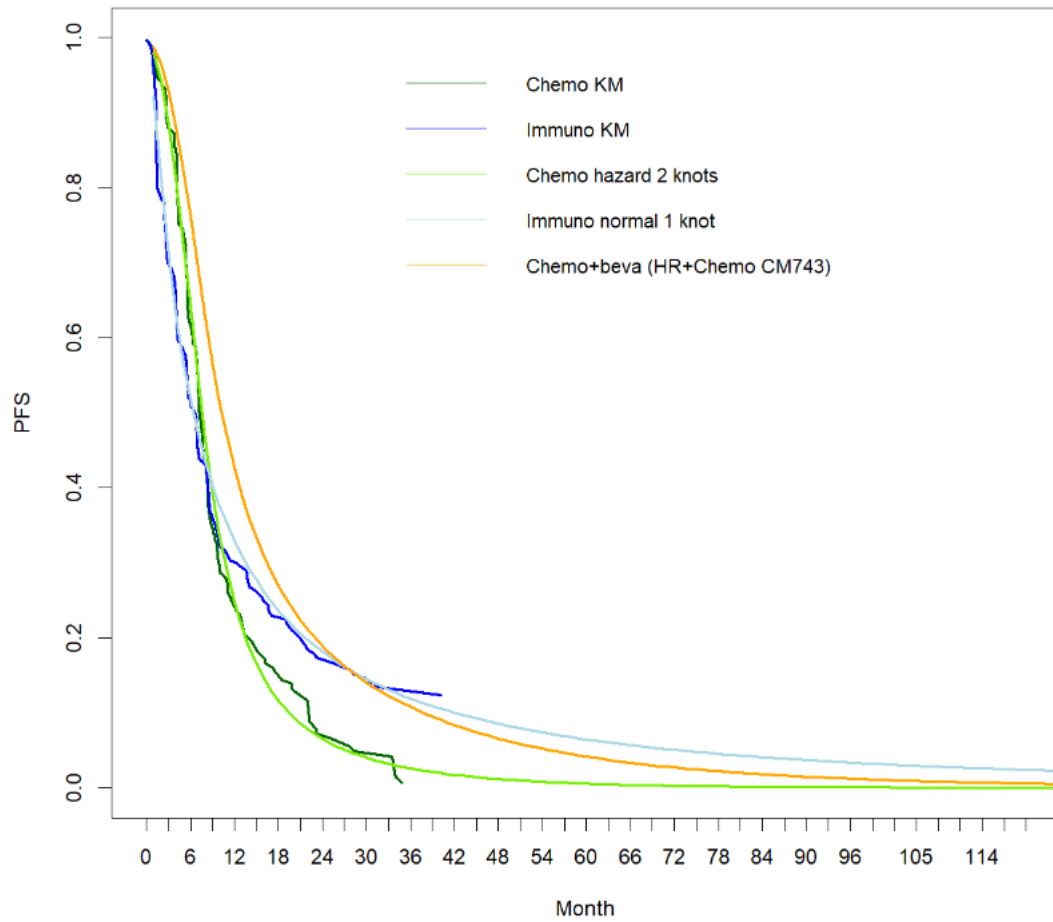

**Supplementary Fig. 18 Progression-free survival estimation**

*Beva* bevacizumab, *chemo* chemotherapy, *CM743* Checkmate-743 trial, *HR* hazard ratio, *immuno* immunotherapy, *KM* Kaplan Meier, *PFS* progression-free survival

### 3.4 Fitted and extrapolated OS and PFS curves for each strategy

All three graphs have been created within the TreeAge partitioned survival model.

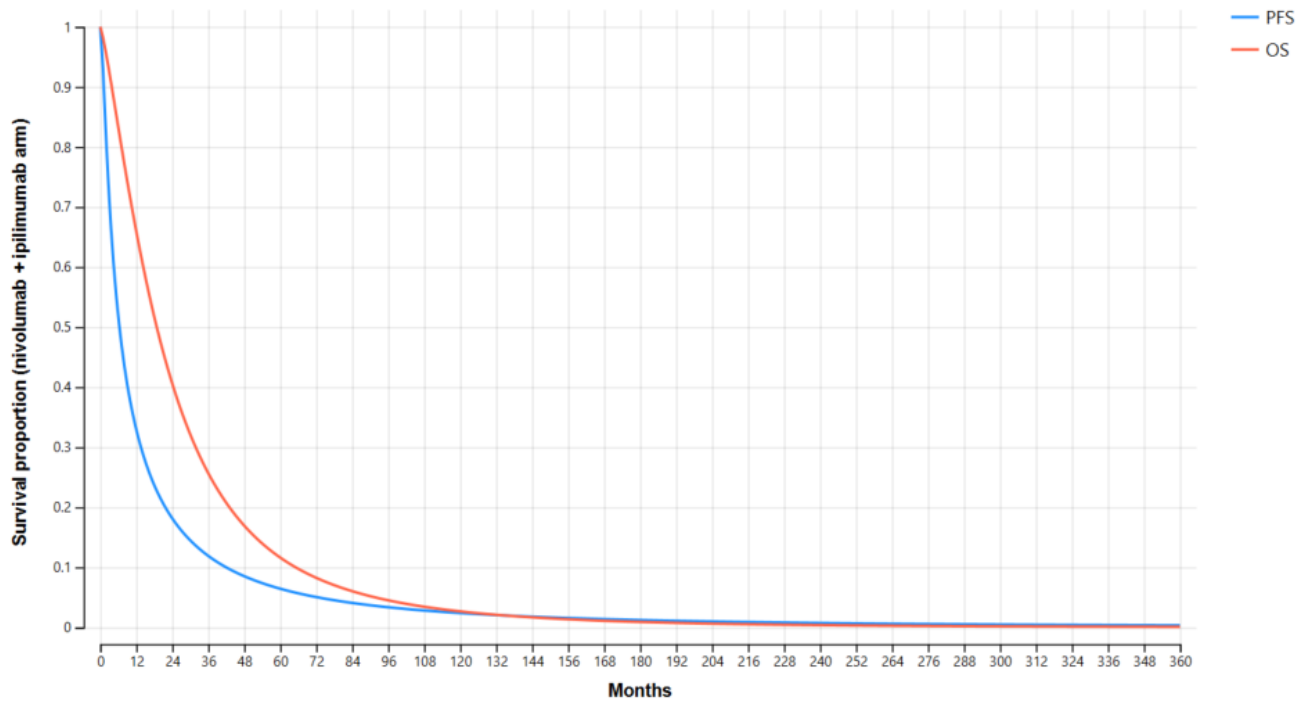

**Supplementary Fig. 19 Fitted and extrapolated OS and PFS curves for nivolumab+ipilimumab strategy**

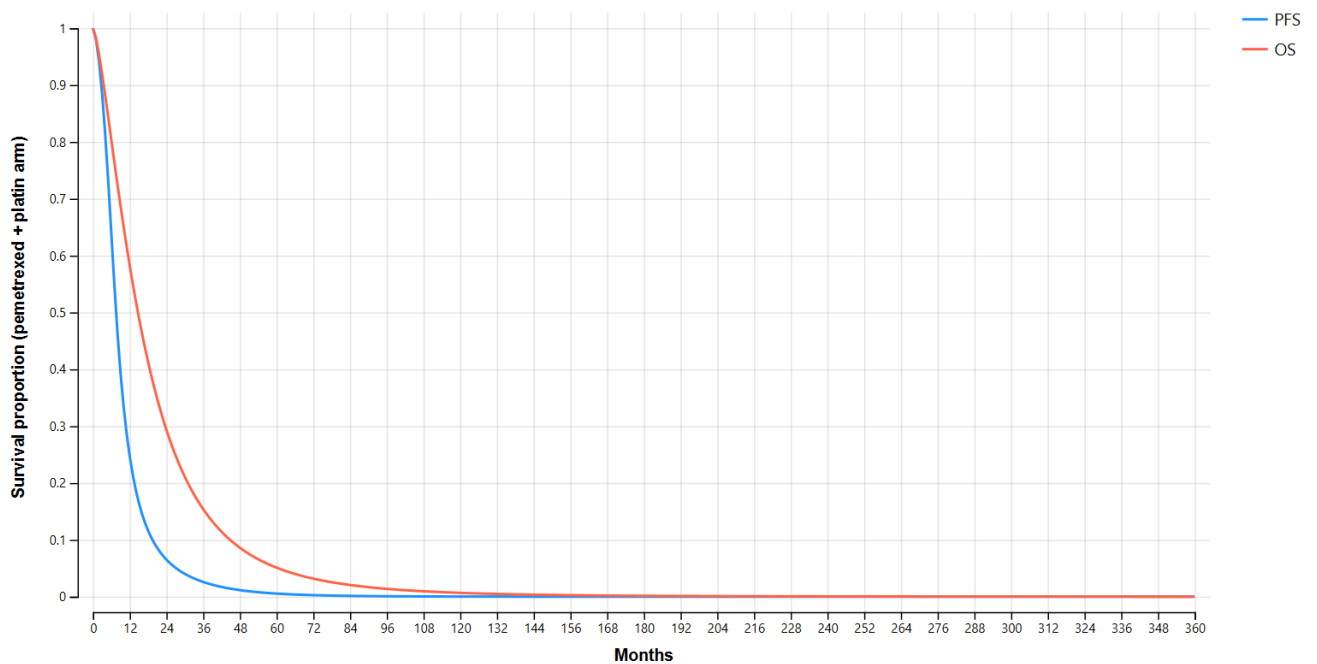

**Supplementary Fig. 20 Fitted and extrapolated OS and PFS curves for pemetrexed+platin strategy**

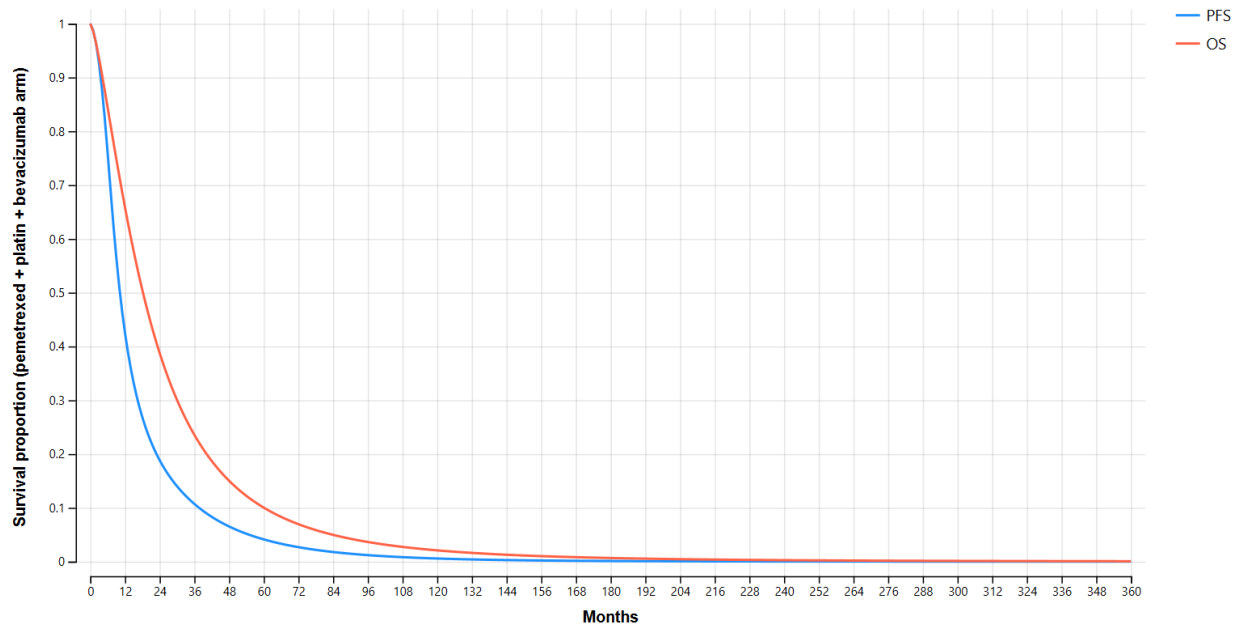

**Supplementary Fig. 21 Fitted and extrapolated OS and PFS curves for pemetrexed+platin+bevacizumab strategy**

### 3.5 Survival curve fitting of CM-743 subgroups

#### 3.5.1 Epithelioid subtype

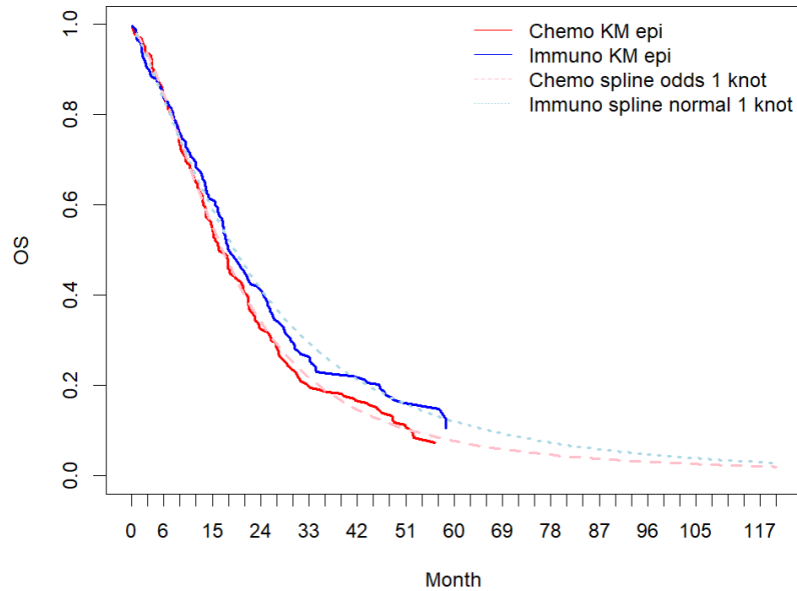

**Supplementary Fig. 22 Overall survival estimation, epithelioid subtype**

*Chemo* chemotherapy, *epi* epithelioid, *immuno* immunotherapy, *KM* Kaplan Meier, *OS* overall survival

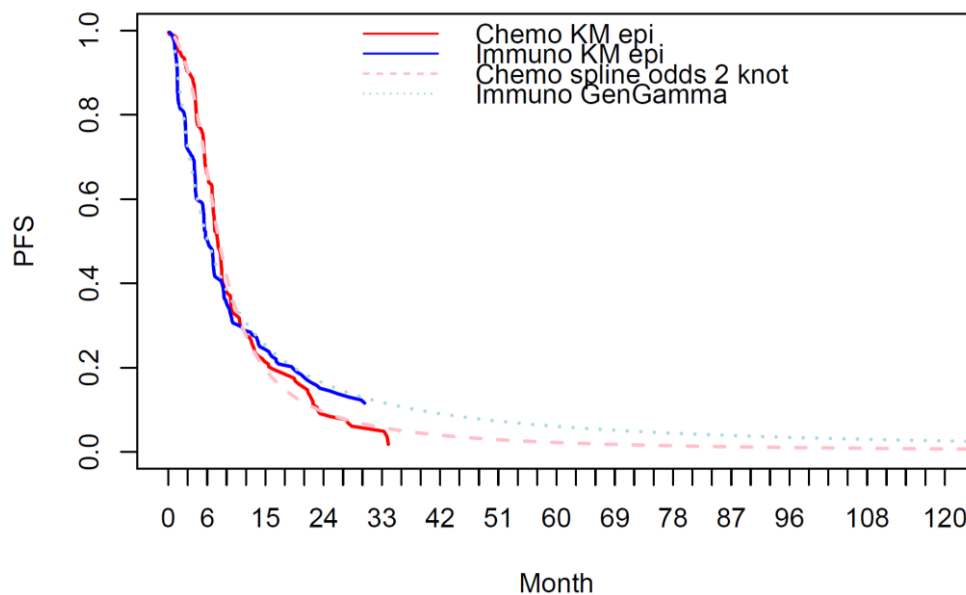

**Supplementary Fig. 23 Progression-free survival estimation, epithelioid subtype**

*Chemo* chemotherapy, *epi* epithelioid, *immuno* immunotherapy, *GenGamma* generalized gamma, *KM* Kaplan Meier, *PFS* progression-free survival



### 3.5.2 Non-epithelioid subtype

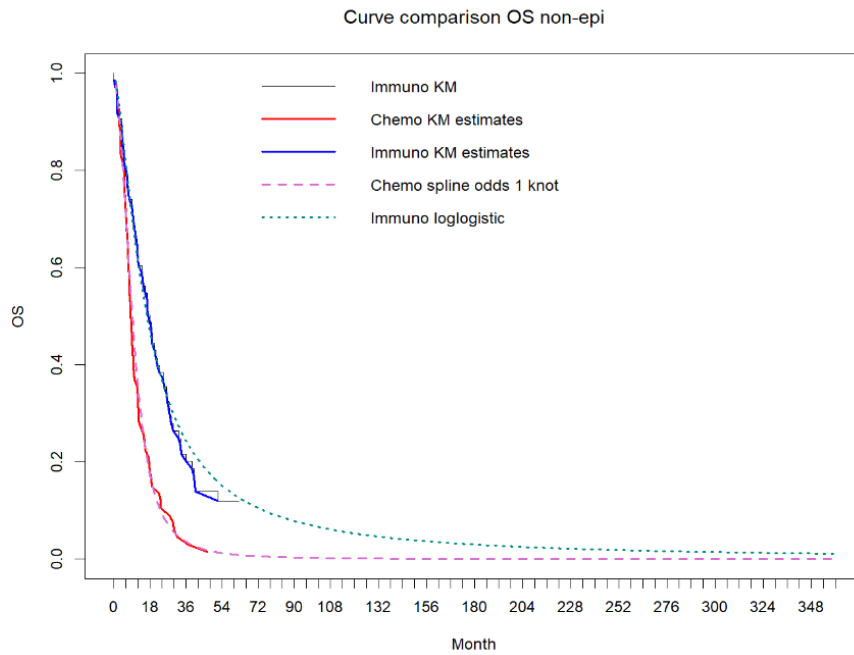

#### Supplementary Fig. 24 Overall survival estimation, non-epithelioid subtype

*Chemo* chemotherapy, *epi* epithelioid, *immuno* immunotherapy, *KM* Kaplan Meier, *OS* overall survival

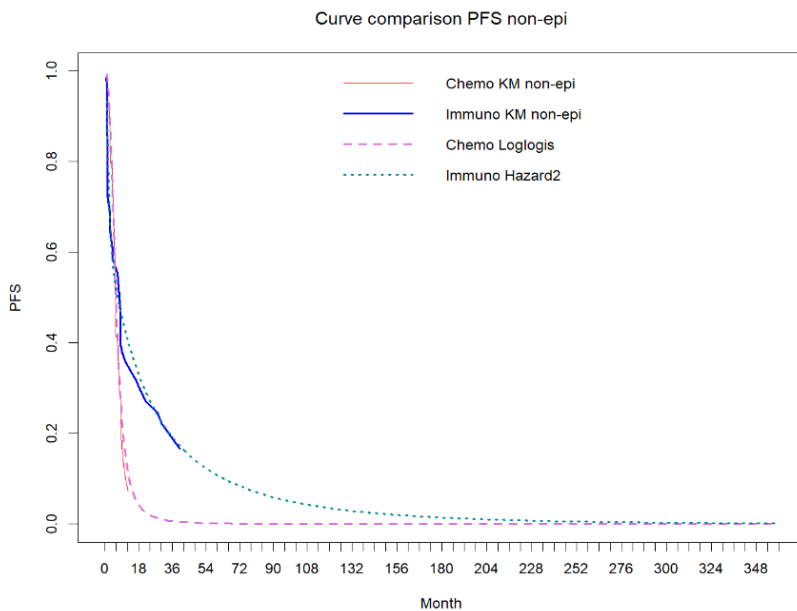

#### Supplementary Fig. 25 Progression-free survival estimation, non-epithelioid subtype

*Chemo* chemotherapy, *epi* epithelioid, *immuno* immunotherapy, *GenGamma* generalised gamma, *KM* Kaplan Meier, *loglogis* log-logistic, *PFS* progression-free survival

# 4 Testing of proportional hazards assumption

## 4.1 Testing of proportional hazards assumption OS CM-743

We performed a visual inspection of the log-cumulative hazards plots and the Schoenfeld residuals to assess proportionality of treatment effects over time.

Log-cumulative plot

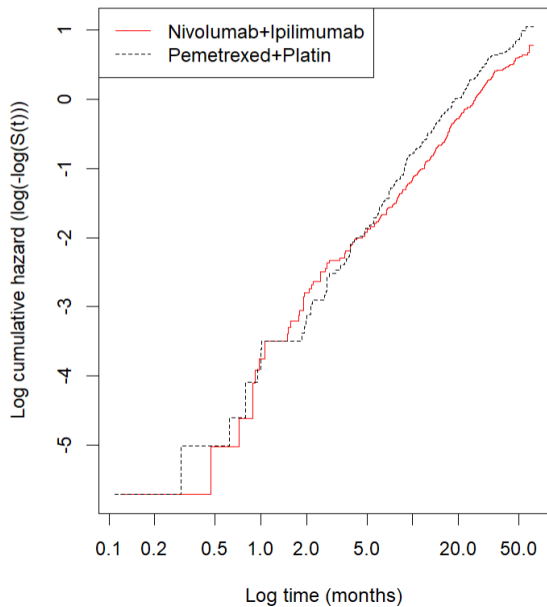

Schönfeld residuals

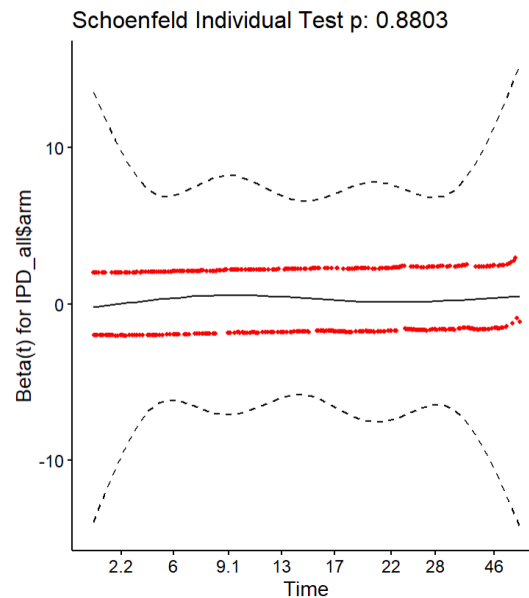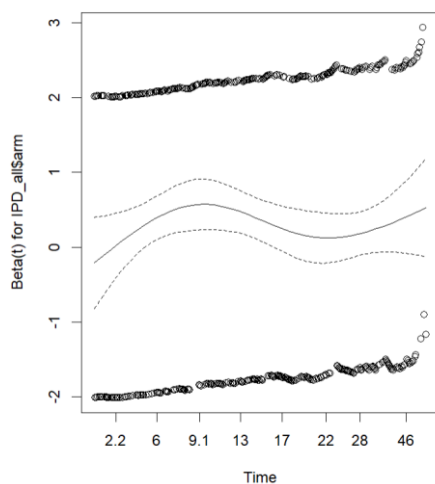

Supplementary Fig. 26 Proportional hazard plots OS CM-743

Schoenfeld residual plots showed an approximately linear pattern, and the test of the Schoenfeld residuals against log(time) did not reject the null hypothesis of proportional hazards (hence it can be assumed). However, inspection of the log-cumulative hazards plot revealed that the cumulative hazard for both arms crosses at multiple time points,

falsifying the assumption of proportional hazards (in line with 3-year data [4]). Therefore, we assumed non-proportional hazard for the 4y-OS data.

## 4.2 Testing of proportional hazards assumption PFS CM-743

Log-cumulative plot

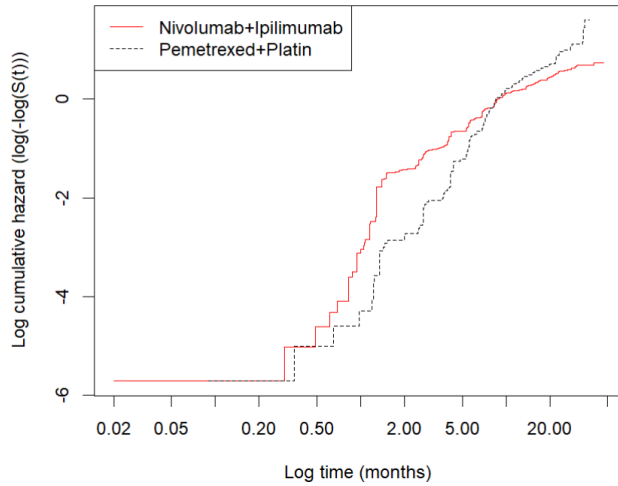

Schönfeld residuals

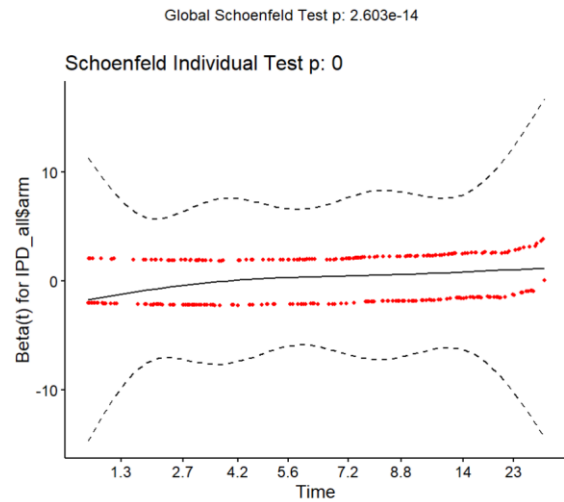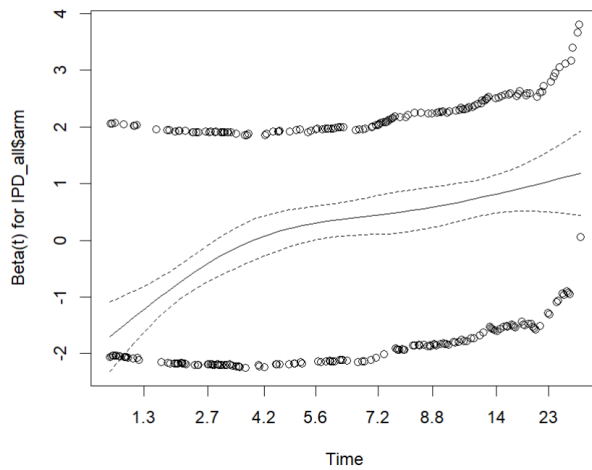

### Supplementary Fig. 27 Proportional hazard plots PFS CM-743

Schoenfeld residual plots did not show a linear pattern and the test of the Schoenfeld residuals against  $\log(\text{time})$  rejected the null hypothesis of proportional hazards ( $p\text{-value} < 0.001$ ). Also, inspection of the log-cumulative hazards plot revealed that the cumulative hazard for the two arms crosses (in line with [4]).

### 4.3 Testing of proportional hazards assumption OS MAPS

Log-cumulative plot

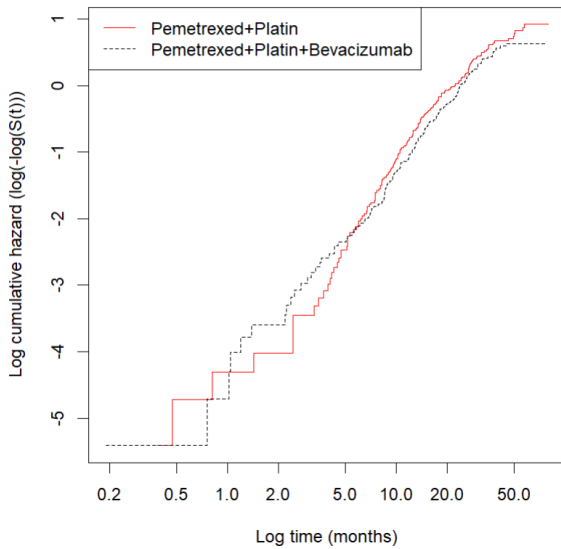

Schönfeld residuals

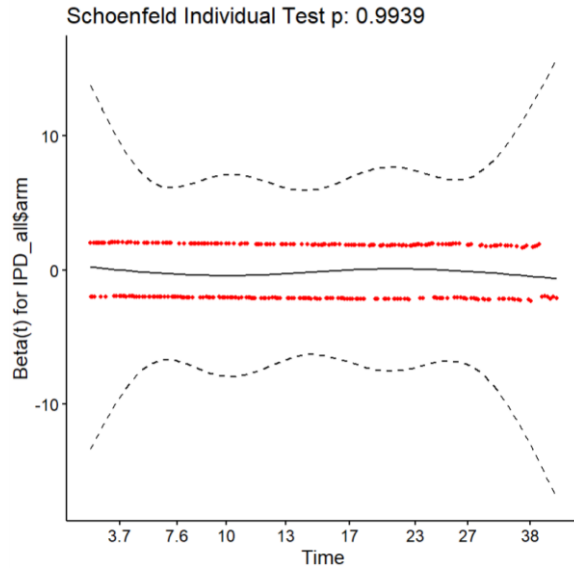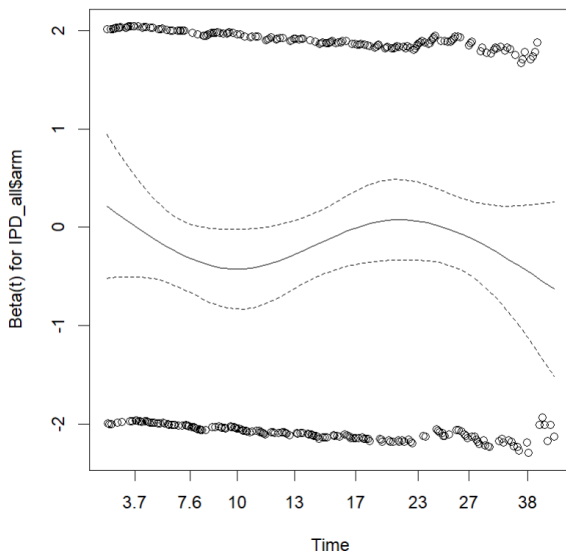

**Supplementary Fig. 28 Proportional hazard plots OS MAPS**

Schoenfeld residual plots showed an approximately linear pattern and the test of the Schoenfeld residuals against  $\log(\text{time})$  did not reject the null hypothesis of proportional hazards (hence it can be assumed). However, inspection of the log-cumulative hazards plot revealed that the cumulative hazard for both arms crossed.

## 4.4 Testing of proportional hazards assumption PFS MAPS

Log-cumulative plot

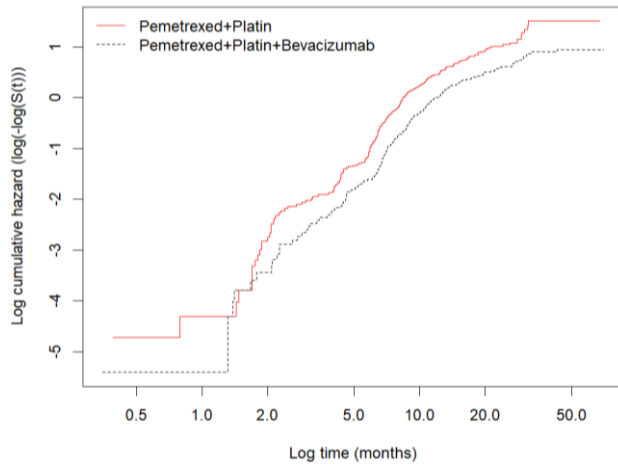

Schönfeld residuals

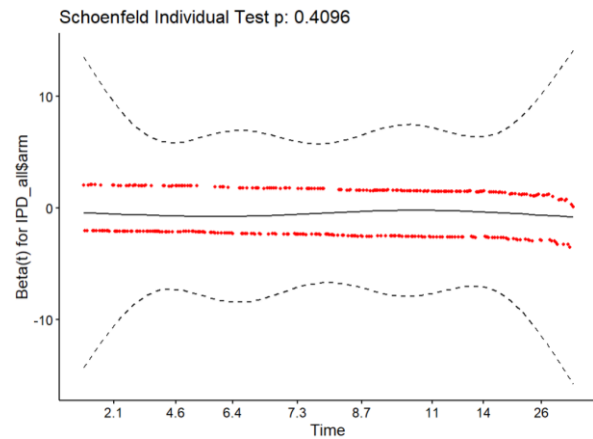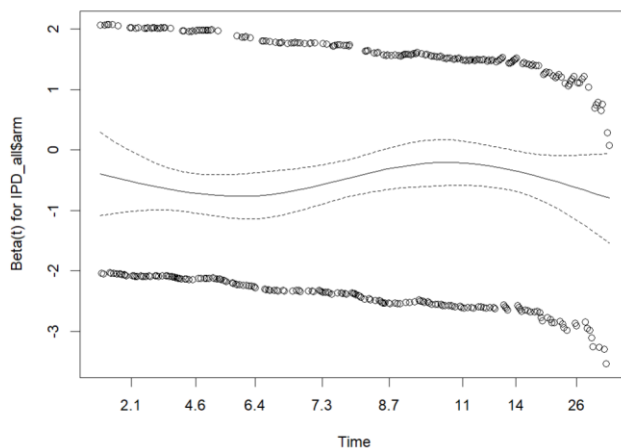

**Supplementary Fig. 29** Proportional hazard plots PFS CM-743

Schoenfeld residual plots showed a linear pattern and the test of the Schoenfeld residuals against  $\log(\text{time})$  (p-value 0.41) did not reject the null hypothesis of proportional hazards. Inspection of the log-cumulative hazards plot revealed that the cumulative hazard for both arms touched early in time but otherwise stayed parallel.

Although the log-cumulative hazard plots crossed for OS, we assumed the proportional hazards assumption to approximately hold for OS and PFS in MAPS since (1) the PFS curves of the MAPS study did not cross (in contrast to the PFS curves of CM-743), (2) the OS MAPS curves only crossed slightly at the beginning and stayed approximately constant over time, (3) the otherwise good results of the Schoenfeld residuals (graphs and statistical test). For this reason, we fitted the PFS pemetrexed+platin+bevacizumab curve with the MAPS HR adjusted to the pemetrexed+platin arm of the CM-743 study.

## 5 Comparison of Kaplan-Meier curves

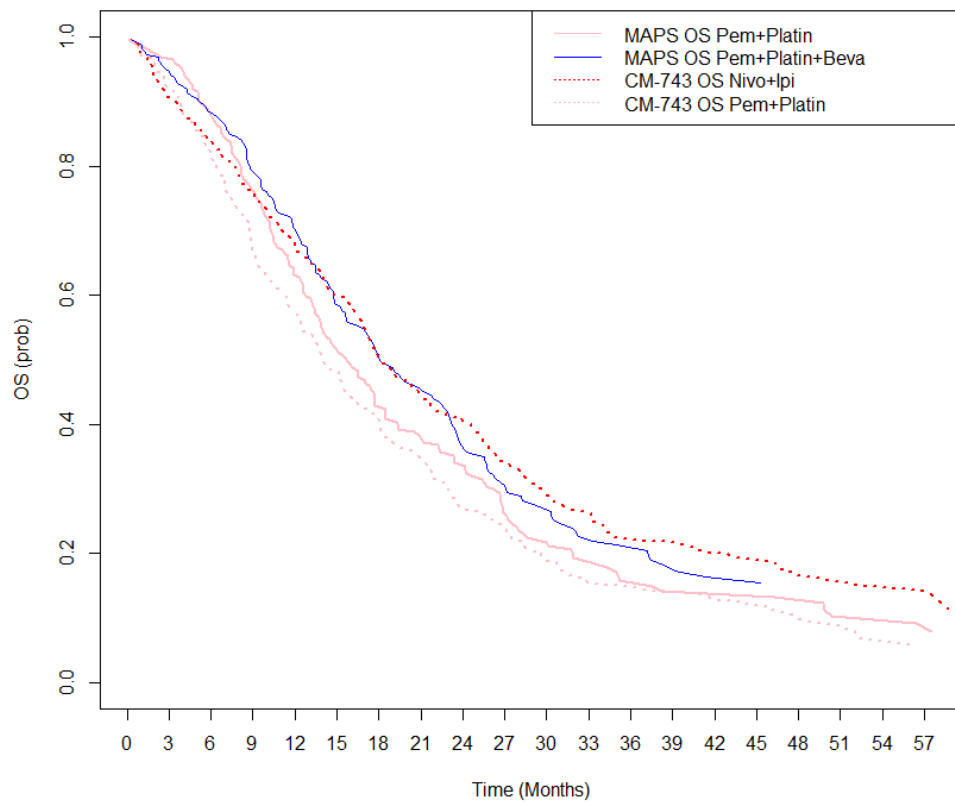

**Supplementary Fig. 30** Recreated OS KM estimates of CM-743 and MAPS

*Beva* bevacizumab, *ipi* ipilimumab, *nivo* nivolumab, *OS* overall survival, *pem* pemetrexed

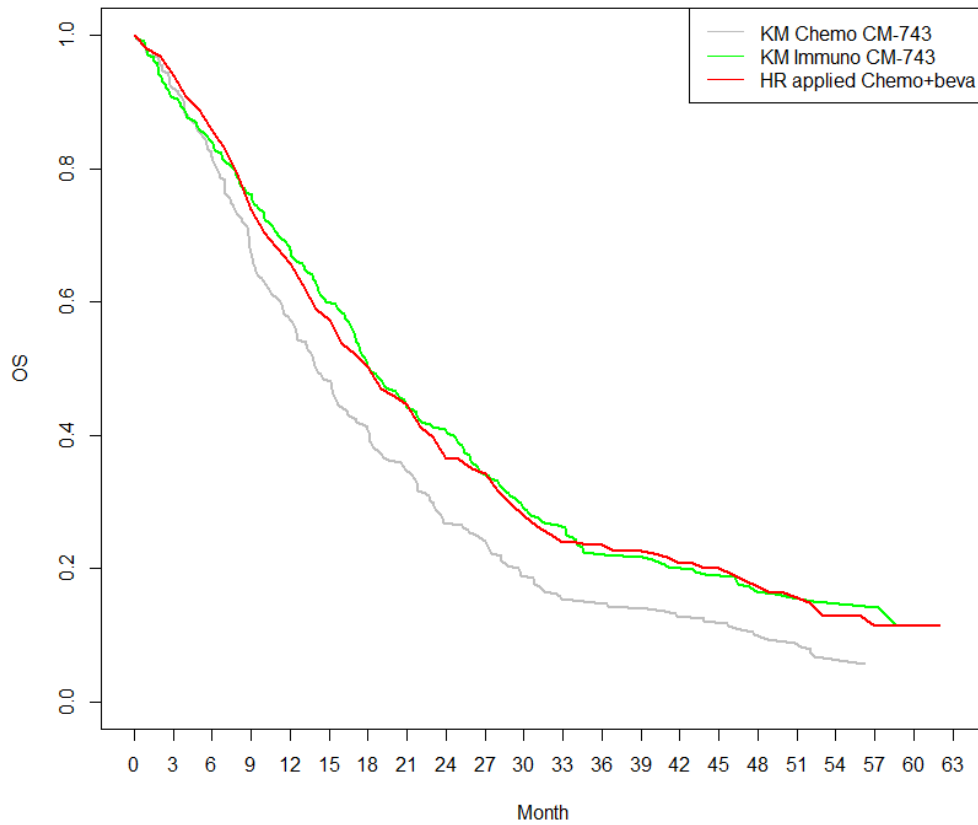

**Supplementary Fig. 31** Recreated OS KM estimates of CM-743 and HR-based MAPS pem+platin+beva estimates

*Beva* bevacizumab, *chemo* chemotherapy, *HR* hazard ratio, *immuno* immunotherapy, *KM* Kaplan Meier, *OS* overall survival

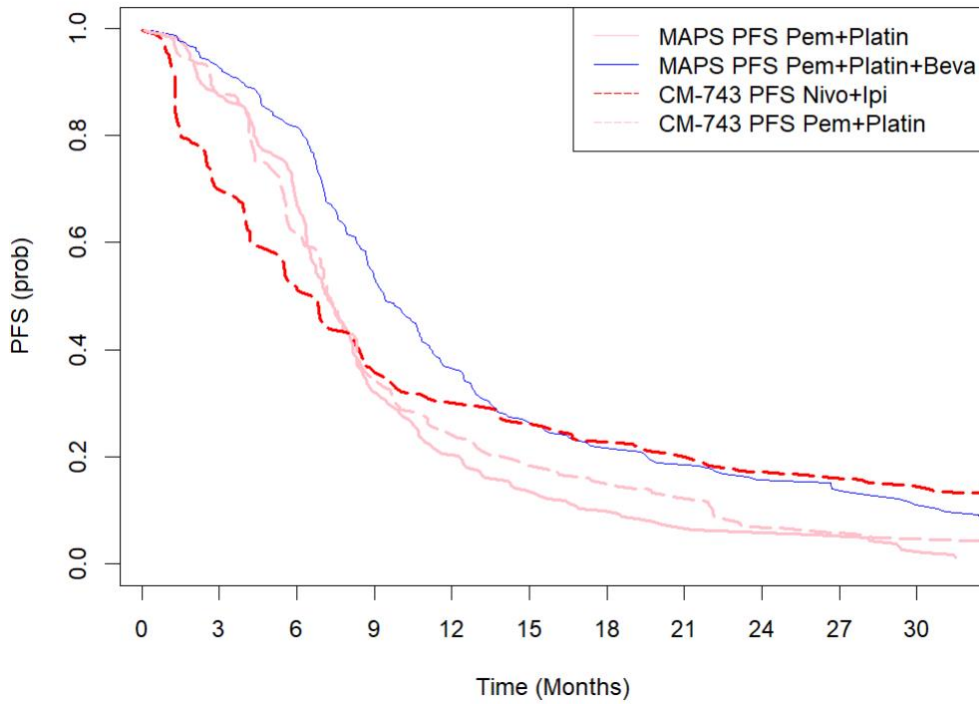

**Supplementary Fig. 32** Recreated PFS KM estimates of CM-743 and MAPS

*Beva* bevacizumab, *ipi* ipilimumab, *nivo* nivolumab, *pem* pemetrexed, *PFS* progression-free survival

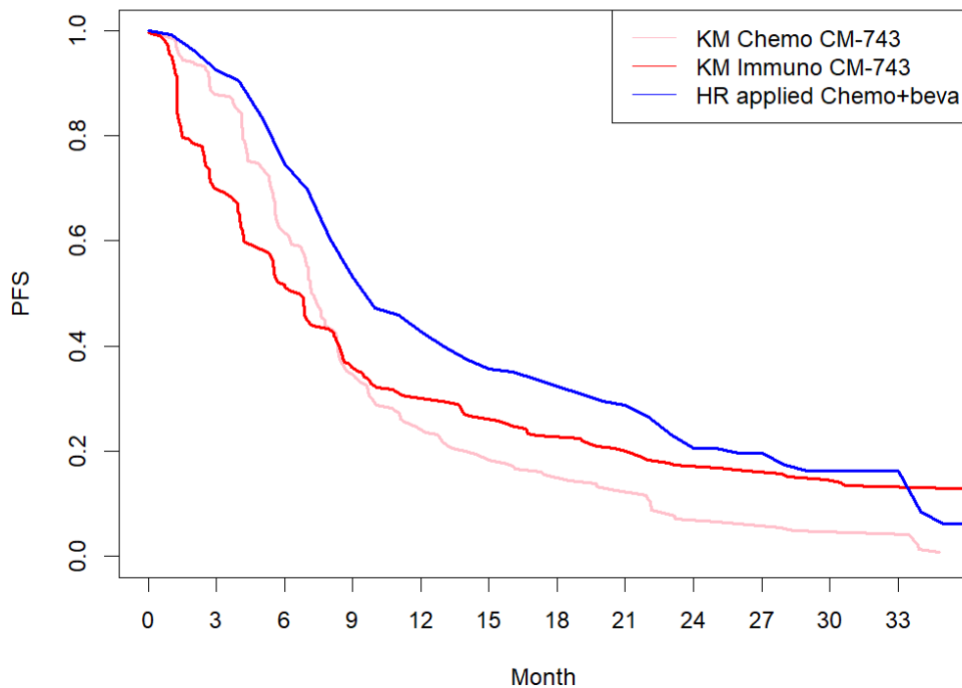

**Supplementary Fig. 33** Recreated PFS KM estimates of CM-743 and HR-based MAPS pem+platin+beva estimates

*Beva* bevacizumab, *chemo* chemotherapy, *HR* hazard ratio, *immuno* immunotherapy, *KM* Kaplan Meier, *PFS* progression-free survival



## 6 Follow-up treatments

CM-743 reported patient progression of 86% in the immuno- and of almost 100% in the chemo-arm for the 3-year data [6]. However, only the number and percentages of patients with systemic further line treatment of all patients at baseline for nivolumab+ipilimumab (n=136/303, 44.9%) and pemetrexed+platin (n=128/302, 42.4%) were reported [6]. The number of patients who were still alive and received further line treatment at the start of their progression was not shown. Also, patients may have received more than one type of subsequent therapy. In general, all possible further line treatments are (equally) limited in efficacy and it is currently unclear which one is best to use in clinical practise. For all of these reasons, we rather used a realistic (currently applied) mix of further line treatments in Switzerland after discussion of these within our medical expert group. In the UK company model for the NICE submission, all non-National Health Service second-line treatment costs from both arms had been removed after questioning by the evidence review group [7].

**Supplementary Table 5.** Follow-up treatments

| 1L                                 | 2L treatments |                                                                            | Source                                                                                                          | 3L treatments                 |                                                                   | Source                                                                           |
|------------------------------------|---------------|----------------------------------------------------------------------------|-----------------------------------------------------------------------------------------------------------------|-------------------------------|-------------------------------------------------------------------|----------------------------------------------------------------------------------|
| Nivolumab + ipilimumab             | 65%           | carboplatin + pemetrexed for 3 months in Markov model (2 months in PartSA) | % derived from Peters (44.9%) and own assumptions.<br><br>Durations from Baas first-line (mean of 3 months) [8] | 35%                           | 17.5% Gemcitabin for 2 months in Markov model (1 month in PartSA) | Durations derived from Popat 2020 PROMISE-meso trial [9]<br><br>% own assumption |
|                                    |               |                                                                            |                                                                                                                 |                               | 17.5% vinorelbin for 2 months (1 month in PartSA)                 |                                                                                  |
|                                    |               |                                                                            | 30%                                                                                                             | late-stage palliative         |                                                                   |                                                                                  |
|                                    | 35%           | late-stage palliative                                                      |                                                                                                                 | difference to 100%            | continuation of late-stage palliative                             |                                                                                  |
| Platin + pemetrexed (+bevacizumab) | 62%           | nivolumab monotherapy for 4 months in Markov model (3 months in PartSA)    | nivolumab [10]                                                                                                  | 35%                           | 17.5% gemcitabin for 2 months (1 month in PartSA)                 | Durations derived from Popat 2020 PROMISE-meso trial [9]                         |
|                                    |               |                                                                            |                                                                                                                 |                               | 17.5% vinorelbin for 2 months (1 month in PartSA)                 |                                                                                  |
|                                    |               |                                                                            | 27%                                                                                                             | new new late-stage palliative |                                                                   |                                                                                  |
|                                    |               | 38%                                                                        | late-stage palliative                                                                                           |                               | difference to 100%                                                | continuation of late-stage palliative                                            |

<sup>a</sup> In the probabilistic sensitivity analysis, the parameter was varied with a beta distribution (mean, mean\*0.2). In deterministic sensitivity analysis we used the 2.5% and 97.5% percentiles of the beta distribution.

*Carbo* carboplatin, *PartSA* partitioned survival analysis, *2L* second-line, *3L* third-line

Overall, we consider the estimated percentages of 2L and 3L treatments only as approximative and varied them in sensitivity analyses. The percentages of further lines of treatment of the triple treatment with bevacizumab were varied independently of the percentages of the chemotherapy arm without bevacizumab.

During the period of further lines of treatment in the progressed state, drug, administration, physician visits, and laboratory costs were included in the analysis. Treatment-unspecific imaging costs were also incorporated (Supplementary Table 10).

## 7 Utilities

**Supplementary Table 6.** Utility input parameters, Markov state transition model

| Health State | On/Off Treatment | Nivolumab+ ipilimumab | Pemetrexed + platin | Pemetrexed + platin + bevacizumab            | Source              |
|--------------|------------------|-----------------------|---------------------|----------------------------------------------|---------------------|
| PFD          | On               | 0.736 (0.012)         | 0.734 (0.012)       | Assume the same as under chemo but never off | NICE 2021 p.200 [5] |
|              | Off              | 0.733 (0.021)         | 0.719 (0.017)       |                                              |                     |
| PD           | On               | 0.708 (0.016)         | 0.638 (0.030)       | Assume the same as under chemo but never off |                     |
|              | Off              | 0.607 (0.015)         | 0.572 (0.015)       |                                              |                     |

*PD* progressed disease, *PFD* Progression-free disease

**Supplementary Table 7.** Utility input parameters of PD state, partitioned survival model

| Health State | On/Off Treatment | Nivolumab+ ipilimumab | Pemetrexed + platin | Pemetrexed + platin + bevacizumab            | Source                 |
|--------------|------------------|-----------------------|---------------------|----------------------------------------------|------------------------|
| PD           | NA               | 0.65 (0.01)           | 0.58 (0.02)         | Assume the same as under chemo but never off | NICE 2021 p.99/481 [5] |

*NA* Not applicable, *PD* progressed disease

## 8 Overview input parameters

**Supplementary Table 8.** Input parameters

| Input parameter             | Estimate               | DA Min | DA Max | PA distribution       | Description / Comment                                                                            | Source                         |
|-----------------------------|------------------------|--------|--------|-----------------------|--------------------------------------------------------------------------------------------------|--------------------------------|
| <b>Drug Costs 2022</b>      | Monthly costs (in CHF) | --     | --     | --                    |                                                                                                  | Swiss Specialty list (SL) [11] |
| Nivolumab monthly           | 7,422.72               | 4,813  | 10,594 | --                    | DA limits are 95% Cs based on 10,000 simulations runs from a gamma distribution (mean, 0.2*mean) |                                |
| Ipilimumab monthly          | 6,559.32               | 4,246  | 9,370  | --                    |                                                                                                  |                                |
| Bevacizumab monthly         | 4,869.11               | 3,147  | 6,966  | --                    |                                                                                                  |                                |
|                             | Pack costs             |        |        |                       |                                                                                                  |                                |
| Nivolumab                   | 3,407.15               | --     | --     | --                    | Pack Size 240 mg                                                                                 | Can be varied with a certain % |
| Ipilimumab                  | 4,516.25               | --     | --     | --                    | Pack Size 50 mg                                                                                  | Can be varied with a certain % |
| Pemetrexed                  | 1,274.70               | --     | --     | --                    | 1000 mg/40ml                                                                                     |                                |
| Vitamin B9 Folic Acid       | 7.20                   | --     | --     | --                    | 28 pieces                                                                                        |                                |
|                             | 14.20                  |        |        |                       | 100 pieces                                                                                       |                                |
| Vitamin B12 supplement      | 17.80                  | --     | --     | --                    | 1000µg, BL for immunotherapy 1L; BL, 3. and 6. cycle for chemotherapy arms 1L                    |                                |
| Carboplatin                 | 47.05                  | --     | --     | --                    | 150 mg                                                                                           |                                |
| Bevacizumab                 | 1,117.50               | --     | --     | --                    | 400 mg i.v. for 90 (60, 30) minutes for the 1st (2nd, all subsequent) infusion(s)                |                                |
| Palonosetron                | 68.45                  | --     | --     | --                    | 0.25mg i.v. D0 Q3W during chemotherapy                                                           |                                |
| Dexamethasone               | 20.80                  | --     | --     | --                    | Tablets 4 mg 20 pieces, costs added during 1. cycle                                              |                                |
| Gemcitabine                 | 624.23                 | --     | --     | --                    |                                                                                                  |                                |
| Vinorelbine                 | 847.61                 | --     | --     | --                    |                                                                                                  | Swiss SL                       |
|                             | DRG one-off costs      |        |        |                       |                                                                                                  |                                |
| Cisplatin inpatient stay    | 4,221.57               | --     | --     | --                    |                                                                                                  | SwissDRG [12]                  |
| Pemetrexed "Zusatzentgelt"  | 2,417.28               | 1,566  | 3,453  | Gamma(mean, 0.2*mean) |                                                                                                  | SwissDRG "Zusatzentgelte"      |
| Bevacizumab "Zusatzentgelt" | 3,084.09               | 1,996  | 4,413  | No PA                 |                                                                                                  | SwissDRG "Zusatzentgelte"      |
|                             |                        |        |        |                       |                                                                                                  |                                |

| Input parameter                                                               | Estimate                            | DA Min                         | DA Max                         | PA distribution                                                              | Description / Comment                                                                                                                            | Source                  |
|-------------------------------------------------------------------------------|-------------------------------------|--------------------------------|--------------------------------|------------------------------------------------------------------------------|--------------------------------------------------------------------------------------------------------------------------------------------------|-------------------------|
| <b>I.V. outpatient administration</b>                                         | Costs per visit (in CHF)            | Varied costs per strategy *0.7 | Varied costs per strategy *1.3 | Varied overall costs per strategy with gamma distribution (mean=1, SE=0.153) |                                                                                                                                                  | TARMED 1.09 [13]        |
| Nivolumab, bevacizumab, gemcitabine or vinorelbine                            | 186.66                              |                                |                                |                                                                              |                                                                                                                                                  |                         |
| Nivolumab+ipilimumab                                                          | 315.53                              |                                |                                |                                                                              |                                                                                                                                                  |                         |
| Pemetrexed+carboplatin                                                        | 294.24                              |                                |                                |                                                                              |                                                                                                                                                  |                         |
| Pemetrexed+carboplatin+ bevacizumab                                           |                                     |                                |                                |                                                                              |                                                                                                                                                  |                         |
| 1st infusion                                                                  | 600.35                              |                                |                                |                                                                              |                                                                                                                                                  |                         |
| 2nd infusion                                                                  | 557.77                              |                                |                                |                                                                              |                                                                                                                                                  |                         |
| >=3. infusion                                                                 | 515.19                              |                                |                                |                                                                              |                                                                                                                                                  |                         |
|                                                                               |                                     |                                |                                |                                                                              |                                                                                                                                                  |                         |
| <b>Physician visit costs</b>                                                  | Costs per visit(in CHF)             | Monthly total varied *0.7      | Monthly total varied *1.3      | Monthly total costs varied with gamma distribution (mean=1, SE=0.153)        |                                                                                                                                                  | TARMED 1.09 [13]        |
| 1L Screening visit                                                            | 428.16                              |                                |                                |                                                                              |                                                                                                                                                  |                         |
| Regular oncologist visit (during and after treatment duration end)            |                                     |                                |                                |                                                                              |                                                                                                                                                  |                         |
| - without report                                                              | 186.59                              |                                |                                |                                                                              | For 2L nivolumab monotherapy, 3L gemcitabine/vinorelbine (on days 1 and 8)                                                                       |                         |
| - with report                                                                 | 220.20                              |                                |                                |                                                                              | Report at BL visit and 1L visits with CT.                                                                                                        |                         |
| Intermediate visit (week 2 out of 3 week cycle) or late palliative care visit | 169.40                              |                                |                                |                                                                              | For intermediate chemotherapy 1L and 2L carboplatin visits                                                                                       |                         |
|                                                                               |                                     |                                |                                |                                                                              |                                                                                                                                                  |                         |
| <b>Laboratory costs</b>                                                       | Costs per laboratory visit (in CHF) | Monthly total varied *0.7      | Monthly total varied *1.3      | Monthly total costs varied with gamma distribution (mean=1, SE=0.153)        |                                                                                                                                                  | Analysis list (AL) [14] |
| Full blood count                                                              | 70.50                               |                                |                                |                                                                              | Haematogram V + chemistry 1+2; for chemotherapy arms amylase and lipase costs (CHF 6.80) were subtracted. Also used for nivolumab monotherapy 2L |                         |

| Input parameter                                              | Estimate               | DA Min                    | DA Max                    | PA distribution                                                       | Description / Comment                                                                | Source                                                        |
|--------------------------------------------------------------|------------------------|---------------------------|---------------------------|-----------------------------------------------------------------------|--------------------------------------------------------------------------------------|---------------------------------------------------------------|
| TSH, free T3 and T4 test                                     | 25.60                  |                           |                           |                                                                       | For nivolumab+ipilimumab arm only                                                    |                                                               |
| Hepatitis B+C test                                           | 31.40                  |                           |                           |                                                                       | Once at BL for all arms                                                              |                                                               |
| Small lab                                                    | 13.10                  |                           |                           |                                                                       | Contains Haematogram V only. For intermediate chemotherapy arm visits                |                                                               |
|                                                              |                        |                           |                           |                                                                       |                                                                                      |                                                               |
| <b>Imaging costs</b>                                         | Costs per visit        | Monthly total varied *0.7 | Monthly total varied *1.3 | Monthly total costs varied with gamma distribution (mean=1, SE=0.153) | All imaging costs also assumed for cisplatin arms since performed in separate visits |                                                               |
| Screening Biopsy                                             | 13,439                 |                           |                           |                                                                       | One-off costs                                                                        | SwissDRG (E02C)                                               |
| CT Scan chest + abdomen                                      | 811                    |                           |                           |                                                                       | Every 6 weeks during 1. year, every 3 months afterwards                              | TARMED, "Real-world" data of the cantonal hospital of Lucerne |
|                                                              |                        |                           |                           |                                                                       |                                                                                      |                                                               |
| <b>First-line (1L) AE costs</b>                              | One-off costs (in CHF) |                           |                           |                                                                       |                                                                                      | See Supplementary Table 9 for more details                    |
| Nivolumab+ipilimumab                                         | 1,042                  | 682.81                    | 1,500.47                  | Gamma(mean=1, SE=0.153)                                               |                                                                                      |                                                               |
| Pemetrexed+carboplatin                                       | 677                    | 437.26                    | 966.11                    |                                                                       |                                                                                      |                                                               |
| Pemetrexed+cisplatin                                         | 1,221                  | 791.09                    | 1,752.33                  |                                                                       |                                                                                      |                                                               |
| Pemetrexed+cisplatin + bevacizumab                           | 3,608                  | 2,344.69                  | 5,156.21                  |                                                                       |                                                                                      |                                                               |
| <b>Maximum first line treatment durations</b>                |                        |                           |                           |                                                                       |                                                                                      |                                                               |
| 1L Nivolumab+ipilimumab                                      | 14                     | --                        | --                        | --                                                                    |                                                                                      | Baas Table S1<br>Mean=7.9 months,<br>Median=5.6 months [8]    |
| 1L Pemetrexed+carboplatin                                    | 3                      | --                        | --                        | --                                                                    |                                                                                      | Baas Mean=3 months<br>Median= 3.5 Months [8]                  |
|                                                              |                        |                           |                           |                                                                       |                                                                                      |                                                               |
| <b>Treatment durations of further lines in Markov models</b> |                        |                           |                           |                                                                       |                                                                                      |                                                               |
| 2L Nivolumab                                                 | 4                      | 2.607                     | 5.674                     | Gamma(mean, 0.2*mean)                                                 | 3 month in partitioned survival analysis model                                       |                                                               |
| 2L Pemetrexed+carboplatin                                    | 3                      | 1.917                     | 4.253                     | Gamma(mean, 0.2*mean)                                                 | 2 month in partitioned survival analysis model                                       | Baas Mean 1L duration 3 months [8]                            |
| 3L Gemcitabine/ Vinorelbine                                  | 2                      | 1.295                     | 2.863                     | Gamma(mean, 0.2*mean)                                                 | 1 month in partitioned survival analysis model                                       |                                                               |
|                                                              |                        |                           |                           |                                                                       |                                                                                      |                                                               |

| Input parameter                                            | Estimate                 | DA Min | DA Max | PA distribution        | Description / Comment | Source                                                |
|------------------------------------------------------------|--------------------------|--------|--------|------------------------|-----------------------|-------------------------------------------------------|
| <b>Proportion of patients with further line treatments</b> |                          |        |        |                        |                       | Own assumptions                                       |
| 2L Pemetrexed+carboplatin after 1L Immunotherapy           | 0.65                     | 0.372  | 0.878  | Beta(mean, 0.2*mean)   |                       |                                                       |
| 2L Nivolumab after 1L Chemotherapy                         | 0.62                     | 0.366  | 0.840  | Beta(mean, 0.2*mean)   |                       |                                                       |
| 3L Gem or Vio after 1L Immunotherapy                       | 0.35                     | 0.221  | 0.494  | Beta(mean, 0.2*mean)   |                       |                                                       |
| 3L Gem or Vio after 1L Chemotherapy                        | 0.35                     | 0.221  | 0.494  | Beta(mean, 0.2*mean)   |                       |                                                       |
|                                                            |                          |        |        |                        |                       |                                                       |
| <b>Late-stage palliative care</b>                          | Monthly costs (in CHF)   |        |        |                        |                       |                                                       |
| Monthly visit + laboratory tests + pain medication         | 159.26                   | 103.17 | 228.50 | Gamma(mean, 0.2*mean)  |                       | AL, SL, TARMED                                        |
|                                                            | One-off costs (in CHF)   |        |        |                        |                       |                                                       |
| <b>Inpatient terminal/EOL costs</b>                        | 27,427                   | 17,829 | 39,080 | Gamma(mean, 0.2*mean)  |                       | "Real-world" data of the cantonal hospital of Lucerne |
|                                                            |                          |        |        |                        |                       |                                                       |
| <b>Utilities</b>                                           |                          |        |        |                        | >=10000 simulations   | NICE 2021 HTA [5] (page 200)                          |
| PFS Immunotherapy on treatment mean (SE)                   | 0.736                    | 0.712  | 0.759  | Beta(mean, SE=(0.012)) |                       |                                                       |
| PFS Immunotherapy on treatment SE                          |                          |        |        | not varied             |                       |                                                       |
| PFS Immunotherapy off mean (SE)                            | 0.733                    | 0.692  | 0.773  | Beta(mean, SE=(0.021)) |                       |                                                       |
| PFS Immunotherapy off SE                                   |                          |        |        | not varied             |                       |                                                       |
| PFS Pemetrexed+carboplatin on                              | 0.734                    | 0.710  | 0.757  | Beta(mean, SE=0.012)   |                       |                                                       |
| PFS Pemetrexed+carboplatin on SE                           |                          |        |        | not varied             |                       |                                                       |
| PFS Pemetrexed+carboplatin off                             | 0.719                    | 0.685  | 0.752  | Beta(mean, SE=0.017)   |                       |                                                       |
| PFS Pemetrexed+carboplatin off SE                          |                          |        |        | not varied             |                       |                                                       |
| PFS Pem+platin+bevacizumab                                 | = PFS Chemotherapy on    | 0.710  | 0.757  | Beta(mean, SE)         |                       |                                                       |
| PFS Pem+platin+bevacizumab SE                              | = PFS Chemotherapy on SE | -      | -      | -                      |                       |                                                       |

| Input parameter                                                    | Estimate                          | DA Min | DA Max  | PA distribution                     | Description / Comment                              | Source                                                            |
|--------------------------------------------------------------------|-----------------------------------|--------|---------|-------------------------------------|----------------------------------------------------|-------------------------------------------------------------------|
| <u>For Markov state transition model</u>                           |                                   |        |         |                                     |                                                    |                                                                   |
| PD Immunotherapy on                                                | 0.708                             | 0.676  | 0.739   | Beta(mean, SE=0.016)                |                                                    |                                                                   |
| PD Immunotherapy on SE                                             |                                   |        |         | -                                   |                                                    |                                                                   |
| PD Immunotherapy off                                               | 0.607                             | 0.577  | 0.636   | Beta(mean, SE=0.015)                |                                                    |                                                                   |
| PD Immunotherapy off SE                                            |                                   |        |         | -                                   |                                                    |                                                                   |
| PD Pem+platin on                                                   | 0.638                             | 0.578  | 0.676   | Beta(mean, SE=0.030)                |                                                    |                                                                   |
| PD Pem+platin on SE                                                |                                   |        |         | -                                   |                                                    |                                                                   |
| PD Pem+platin off                                                  | 0.572                             | 0.514  | 0.630   | Beta(mean, SE=0.015)                |                                                    |                                                                   |
| PD Pem+platin off SE                                               |                                   |        |         | -                                   |                                                    |                                                                   |
| PD Pem+platin+bevacizumab on                                       | = PD Chemotherapy on              | 0.578  | 0.676   | Beta(mean, SE)                      |                                                    |                                                                   |
| PD Pem+platin+bevacizumab off                                      | = PD Chemotherapy off             | 0.514  | 0.630   | Beta(mean, SE)                      |                                                    |                                                                   |
| <u>For partitioned survival analysis model (scenario analysis)</u> |                                   |        |         |                                     |                                                    | NICE 2021 HTA [5] (page 99/481)                                   |
| PD Immunotherapy                                                   | 0.65 (0.01)                       |        |         |                                     |                                                    |                                                                   |
| PD Chemotherapy                                                    | 0.58 (0.02)                       |        |         |                                     |                                                    |                                                                   |
| PD Pem+platin+bevacizumab                                          |                                   |        |         |                                     |                                                    |                                                                   |
| <b>Survival modelling overall</b>                                  | Type of fitted distribution or HR |        |         |                                     |                                                    |                                                                   |
| OS Immunotherapy                                                   | Spline Normal 1 knot              | 95%LCL | 95% UCL |                                     |                                                    | Re-created KM curves, selected best fitting curve + extrapolation |
| OS Chemotherapy                                                    | Spline Normal 1 knot              |        |         |                                     |                                                    |                                                                   |
| OS HR Chemotherapy vs Chemotherapy+ Bevacizumab                    | 0.77 base case                    | 0.62   | 0.95    | 0.084 (Scenario: se(ln(HR))=0.1083) |                                                    | Adjusted HR [15]                                                  |
| PFS Immunotherapy                                                  | Spline Normal 1 knot              |        |         |                                     |                                                    | Re-created KM curves, selected best fitting curve + extrapolation |
| PFS Chemotherapy                                                   | Hazard 2 knots                    |        |         |                                     |                                                    |                                                                   |
| PFS HR Chemotherapy vs Chemotherapy+ Bevacizumab                   | 0.61 base case (0.60 scenario)    | 0.50   | 0.75    | 0.064 (Scenario: se(ln(HR))=0.1002) | Unadjusted HR and se from model of re-created data | Adjusted HR [15]                                                  |
| <b>Epithelioid subgroup</b>                                        |                                   |        |         |                                     |                                                    |                                                                   |
| OS Immunotherapy                                                   | Spline Normal 1 knot              |        |         |                                     |                                                    |                                                                   |
| OS Chemotherapy                                                    | Spline Odds 1 knot                |        |         |                                     |                                                    |                                                                   |
| PFS Immunotherapy                                                  | Generalised gamma                 |        |         |                                     |                                                    |                                                                   |
| PFS Chemotherapy                                                   | Spline Odds 2 knots               |        |         |                                     |                                                    |                                                                   |



| Input parameter                                               | Estimate                            | DA Min | DA Max | PA distribution | Description / Comment                                                                                                 | Source                                                               |
|---------------------------------------------------------------|-------------------------------------|--------|--------|-----------------|-----------------------------------------------------------------------------------------------------------------------|----------------------------------------------------------------------|
| <b>Non-Epithelioid subgroup</b>                               |                                     |        |        |                 |                                                                                                                       |                                                                      |
| OS Immunotherapy                                              | Loglogistic                         |        |        |                 |                                                                                                                       |                                                                      |
| OS Chemotherapy                                               | Odds 1 knot                         |        |        |                 |                                                                                                                       |                                                                      |
| PFS Immunotherapy                                             | Hazard 2 knots                      |        |        |                 |                                                                                                                       |                                                                      |
| PFS Chemotherapy                                              | Loglogistic                         |        |        |                 |                                                                                                                       |                                                                      |
|                                                               |                                     |        |        |                 |                                                                                                                       |                                                                      |
| <b>Budget Impact Model inputs</b>                             |                                     |        |        |                 |                                                                                                                       |                                                                      |
| Swiss population (end of 2021)                                | 8,738,800                           | -      | -      |                 |                                                                                                                       | FSO [16]                                                             |
| Swiss population in 2020, 2019, 2018                          | 8,670,000<br>8,606,000<br>8,545,000 | -      | -      |                 |                                                                                                                       | FSO [17]                                                             |
| Annual population growth                                      | 0.8%                                | -      | -      |                 |                                                                                                                       | FSO [16]                                                             |
| MPM incidence rate (per 100,000) in 2019                      | 2.25                                | -      | -      |                 |                                                                                                                       | NICER [18]                                                           |
| Yearly increase in MPM incidence number between 2022 and 2026 | 2.6 persons per year                | -      | -      |                 | Resulted in estimated 206 (2022), 211 (2023), 215 (2024), 219 (2025), 224 (2026) incident MPM patients in Switzerland | Derived from SUVA "Unfallbericht" 2020 assuming linear increase [19] |
| Percentage with non-epithelioid (mean 2015-2019)              | 58.2%                               | -      | -      |                 |                                                                                                                       | NICER [18]                                                           |
| Percentage of PD-L1 >=1% within epithelioid histology group   | 43.7%                               | -      | -      |                 |                                                                                                                       | Cedrés [20]                                                          |
| Market shares in Supplementary Table 8                        |                                     |        |        |                 |                                                                                                                       |                                                                      |

AL Analysis List, CHF Swiss Francs, D Day, DA deterministic analysis, FSO Swiss Federal Statistical Office, Gem gemcitabine, HR hazard ratio, HTA Health Technology Assessment, i.v. intravenous, KM Kaplan-Meier, max maximum value, mg milligram, ml millilitre, min minimum value, MPM malignant pleural mesothelioma, NICER Foundation National Institute for Cancer Epidemiology and Registration, OS overall survival, PD progressed disease, PD-L1 programmed death-ligand 1, pem pemetrexed, PFS progression-free survival, PA probabilistic analysis, Q3W every 3 weeks, sd standard deviation, se standard error, SL (Swiss) specialty list, SUVA Swiss Institute for Accident Insurance, vino vinorelbine, 1L first-line, 2L second-line, 3L third-line. All costs are in Swiss Francs

## 9 Adverse events

**Supplementary Table 9.** Adverse event occurrences and costs

| Adverse event types                       | Percentages of treatment-related AEs |                   |          |               | Further AE information                                                                            | Inpatient costs before weighting (in CHF) <sup>2</sup> | Outpatient costs before weighting (in CHF) | Total costs (in CHF) | AE costs per treatment arm |                   |         |               |
|-------------------------------------------|--------------------------------------|-------------------|----------|---------------|---------------------------------------------------------------------------------------------------|--------------------------------------------------------|--------------------------------------------|----------------------|----------------------------|-------------------|---------|---------------|
|                                           | CM-743                               |                   | MAPS     |               |                                                                                                   |                                                        |                                            |                      | Ipi + Nivo                 | Mainly Carbo+ Pem | Cis+Pem | Cis+Pem+ Beva |
|                                           | Ipi + Nivo                           | Mainly Carbo+ Pem | Cis+ Pem | Cis+Pem +Beva |                                                                                                   |                                                        |                                            |                      |                            |                   |         |               |
| Anaemia                                   | 0.3%                                 | 11.3%             | 13.40%   | 7.20%         | 0% (100%)<br>AL [14], SL [11], TARMED [13], Erythrocyte concentrate [21], Jetscan [22]            | -                                                      | 989                                        | 989                  | 3                          | 112               | 132     | 71            |
| Thrombocytopenia                          | 0.7%                                 | 3.5%              | 9.4%     | 9.9%          | 0% (100%)<br>AL [14], SL [11], TARMED [13], Thrombocyte concentrate [21], Jetscan [22]            | -                                                      | 1,863                                      | 1,863                | 13                         | 65                | 175     | 184           |
| Febrile Neutropenia                       | 0%                                   | 1.1%              | 3.1%     | 1.8%          | 100% (0%)<br>Q60A (10% weight), Q60B (90% weight)                                                 | 10,353<br>7,478                                        | -                                          | 7,766                | 0                          | 85                | 241     | 140           |
| Colitis / diarrhoea                       | 5.6%                                 | 1.1%              | 0.9%     | 0.5%          | 100% (0%)<br>G87B<br>Infliximab supplementary charges                                             | 15,419<br>1,124                                        | -                                          | 16,543               | 926                        | 182               | 149     | 83            |
| Vomiting or nausea                        | 0.3%                                 | 4.6%              | 8.0%     | 0.081         | 100% (0%)<br>G72A (10%), G72B (90%)                                                               | 6,684<br>4,563                                         | -                                          | 4,775                | 14                         | 220               | 382     | 387           |
| Cardiovascular AEs                        |                                      |                   | 0.9%     | 28.8%         | 100% (0%)<br>F62D (45%), F66B (45%), F75D (10%)                                                   | 8,051<br>5,227<br>19,088                               | -                                          | 7,884                | 0                          | 0                 | 71      | 2,271         |
| Hypertension                              |                                      |                   | 0%       | 23.0%         | 20%<br>Inpatient DRG: F67A (90%), F67B (10%)<br><br>(80%)<br>Outpatient:                          | 4,664<br>7,227                                         |                                            | 1,005                | 0                          | 0                 | 0       | 231           |
| Arterial and venous thromboembolic events |                                      |                   | 0.9%     | 5.8%          | 0% (100%)<br>Cost items: drugs (rivaroxaban, dalteparin), physician visit, ultrasound & angio CT; | -                                                      | 3,236                                      | 3,236                | 0                          | 0                 | 29      | 188           |

| Adverse event types                      | Percentages of treatment-related AEs |                   |          |               | Further AE information                                                                                                   | Inpatient costs before weighting (in CHF) <sup>2</sup>                         | Outpatient costs before weighting (in CHF) | Total costs (in CHF) | AE costs per treatment arm |                   |         |               |    |
|------------------------------------------|--------------------------------------|-------------------|----------|---------------|--------------------------------------------------------------------------------------------------------------------------|--------------------------------------------------------------------------------|--------------------------------------------|----------------------|----------------------------|-------------------|---------|---------------|----|
|                                          | CM-743                               |                   | MAPS     |               |                                                                                                                          |                                                                                |                                            |                      | Ipi + Nivo                 | Mainly Carbo+ Pem | Cis+Pem | Cis+Pem+ Beva |    |
|                                          | Ipi + Nivo                           | Mainly Carbo+ Pem | Cis+ Pem | Cis+Pem +Beva |                                                                                                                          |                                                                                |                                            |                      |                            |                   |         |               |    |
|                                          |                                      |                   |          |               | Cost sources:<br>AL [14], SL [11],<br>TARMED [13], Real-<br>world angio CT<br>costs from Cantonal<br>Hospital of Lucerne |                                                                                |                                            |                      |                            |                   |         |               |    |
| Leukopenia                               | 0                                    | 2.8%              |          |               | 0%<br>(100%)                                                                                                             | -                                                                              | 0                                          | 0                    |                            |                   |         |               |    |
| Dermatitis (rash, pruritus)              | 2%                                   | 0                 |          |               | 20%<br>(80%)                                                                                                             | Inpatient DRG: J61D<br>7,428<br><br>Outpatient: SL [11],<br>TARMED [13]<br>489 |                                            | 1,877                | 38                         | 0                 | 0       | 0             |    |
| Increased lipase                         | 4.3%                                 | 0.4%              |          |               | 0%<br>(100%)                                                                                                             | TARMED [13]                                                                    | -                                          | 704                  | 704                        | 30                | 3       | 0             | 0  |
| Increased amylase                        | 2.3%                                 | 0.0%              |          |               | 0%<br>(100%)                                                                                                             | TARMED [13]                                                                    | -                                          | 704                  | 704                        | 16                | 0       | 0             | 0  |
| Creatinine concentration increase        |                                      |                   | 1.8%     | 3.6%          | 0%<br>(100%)                                                                                                             | TARMED [13]                                                                    | -                                          | 704                  | 704                        | 0                 | 0       | 13            | 25 |
| Asthenia or fatigue                      | 1.0%                                 | 6.0%              | 12.5%    | 13.50%        | 0%<br>(100%)                                                                                                             | Real-world costs<br>from Cantonal<br>Hospital of Lucerne                       | -                                          | 176                  | 176                        | 2                 | 11      | 22            | 24 |
| Anorexia                                 |                                      |                   | 4.0%     | 2.3%          | 0%<br>(100%)                                                                                                             | for 2 consultations<br>for nutritional<br>counselling                          | -                                          | 176                  | 176                        | 0                 | 0       | 7             | 4  |
| Neutropenia                              | 0.6%                                 | 15.1%             | 44.6%    | 44.1%         | 0%<br>(100%)                                                                                                             | Assumption of<br>clinical expert group                                         | -                                          | 0                    | 0                          |                   |         |               |    |
| Summed costs per treatment arm (in CHF): |                                      |                   |          |               |                                                                                                                          |                                                                                |                                            |                      | 1,042                      | 677               | 1,221   | 3,608         |    |

AE adverse event, AL analysis list, beva bevacizumab, carbo carboplatin, CHF Swiss Francs, cis cisplatin, CT computed tomography, DRG Diagnosis Related Group, ipi ipilimumab, nivo nivolumab, pem pemetrexed, SL specialty list, TARMED Swiss outpatient tariff system

<sup>1</sup> In case several DRGs were relevant for a particular AE (inpatient hospital treatment), we applied the weights indicated in brackets after the DRG code in order to calculate averaged AE costs.

<sup>2</sup> Hospital inpatient costs were estimated in multiplying the cost weights of relevant diagnosis related group (DRG) codes of the SwissDRG 11.0 system with the latest available (2021/2022) averaged Swiss Cantonal DRG base weights (10,051).

# 10 Resource use

**Supplementary Table 10.** Resource use

| Resource type                     | Description of resource use                                                                                                                                                                 |
|-----------------------------------|---------------------------------------------------------------------------------------------------------------------------------------------------------------------------------------------|
| <u>Physician visits</u>           |                                                                                                                                                                                             |
| On treatment                      | According to dosage administration<br>For the chemotherapy arm only: After 2 weeks short intermediate oncologist visit + small lab                                                          |
| Off treatment                     | Every 3 months oncologist visit including report                                                                                                                                            |
| <u>Imaging</u>                    |                                                                                                                                                                                             |
| Biopsy                            | Once at screening                                                                                                                                                                           |
| CT scan                           | PFD state: Every 6 weeks during the first year, every 3 months afterwards<br>PD: Every 3 months<br>During cisplatin treatment, CT scan counted separately and not included in inpatient DRG |
| <u>Late-stage palliative care</u> | 3-monthly oncologist visit + laboratory tests                                                                                                                                               |

*CT* computed tomography, *DRG* diagnosis related group, *PD* progressed disease, *PFD* progressed-free disease

# 11 Budget impact

Supplementary Table 11. Market Shares

| Strategy and treatments                                 | 2018-2021 <sup>a</sup> | Market Shares                                                                         |      |      |      |      |                                                          |      |      |      |      |
|---------------------------------------------------------|------------------------|---------------------------------------------------------------------------------------|------|------|------|------|----------------------------------------------------------|------|------|------|------|
|                                                         |                        | 2022                                                                                  | 2023 | 2024 | 2025 | 2026 | 2022                                                     | 2023 | 2024 | 2025 | 2026 |
| <b><u>Applying strictly the Swissmedic approval</u></b> |                        | <b>Non-epithelioid OR epithelioid combined with PD-L1<math>\geq</math>1% patients</b> |      |      |      |      | <b>Epithelioid AND PD-L1<math>&lt;</math>1% patients</b> |      |      |      |      |
| Nivolumab+ipilimumab                                    | 0%                     | 60%                                                                                   | 70%  | 80%  | 90%  | 90%  | 0%                                                       | 0%   | 0%   | 0%   | 0%   |
| Pemetrexed + carboplatin                                | 50%                    | 20%                                                                                   | 15%  | 10%  | 5%   | 5%   | 50%                                                      | 50%  | 50%  | 50%  | 50%  |
| Pemetrexed + platinum + bevacizumab                     | 50%                    | 20%                                                                                   | 15%  | 10%  | 5%   | 5%   | 50%                                                      | 50%  | 50%  | 50%  | 50%  |
| <b><u>Targeting all patients</u></b>                    |                        | <b>Non-epithelioid patients</b>                                                       |      |      |      |      | <b>Epithelioid patients</b>                              |      |      |      |      |
| Nivolumab+ipilimumab                                    | 0%                     | 60%                                                                                   | 70%  | 80%  | 90%  | 90%  | 60%                                                      | 70%  | 80%  | 90%  | 90%  |
| Pemetrexed + carboplatin                                | 50%                    | 20%                                                                                   | 15%  | 10%  | 5%   | 5%   | 20%                                                      | 15%  | 10%  | 5%   | 5%   |
| Pemetrexed + platinum + bevacizumab                     | 50%                    | 20%                                                                                   | 15%  | 10%  | 5%   | 5%   | 20%                                                      | 15%  | 10%  | 5%   | 5%   |
| <b><u>No nivolumab+ipilimumab</u></b>                   |                        | <b>Non-epithelioid patients</b>                                                       |      |      |      |      | <b>Epithelioid patients</b>                              |      |      |      |      |
| Nivolumab+ipilimumab                                    | 0%                     | 0%                                                                                    | 0%   | 0%   | 0%   | 0%   | 0%                                                       | 0%   | 0%   | 0%   | 0%   |
| Pemetrexed + carboplatin                                | 50%                    | 50%                                                                                   | 50%  | 50%  | 50%  | 50%  | 50%                                                      | 50%  | 50%  | 50%  | 50%  |
| Pemetrexed + platinum + bevacizumab                     | 50%                    | 50%                                                                                   | 50%  | 50%  | 50%  | 50%  | 50%                                                      | 50%  | 50%  | 50%  | 50%  |

<sup>a</sup> Only the follow-up treatment costs of these patients during the years 2022-2026 were included while continuing their original treatment.

PD-L1 programmed death-ligand 1

At the end of 2021, there were 8,738,800 residents permanently living in Switzerland [16]. There was a growth in the Swiss permanent resident population of 0.8% between 2020 and 2021 [16] leading to an expected population of 8,808,710 at the end of 2022 (Supplementary Table 12).

To estimate the malignant pleural mesothelioma (MPM) incidence of the years 2020 to 2026, we added a yearly increase of 2.6 persons per year to the 2019 MPM incidence rate as derived from the Suva accident statistic (UVG 2020 report [19]), based on 180 MPM patients at the end of 2026, 162 MPM patients at the beginning 2020, and assuming a linear increase.

**Supplementary Table 12.** Number of MPM incident patients in Switzerland

|                                                      | 2018      | 2019      | 2020      | 2021      | 2022      | 2023      | 2024      | 2025      | 2026      | Total since 2022 |
|------------------------------------------------------|-----------|-----------|-----------|-----------|-----------|-----------|-----------|-----------|-----------|------------------|
| Number of patients overall in CH                     | 8,545,000 | 8,606,000 | 8,670,000 | 8,738,800 | 8,808,710 | 8,879,180 | 8,950,214 | 9,021,815 | 9,093,990 |                  |
| MPM incident patients in CH                          | 190       | 194       | 198       | 202       | 206       | 211       | 215       | 219       | 224       | 1'075            |
| Non-epithelioid MPM incident patients                | 79        | 81        | 83        | 84        | 86        | 88        | 90        | 92        | 94        | 449              |
| Epithelioid MPM incident patients                    | 110       | 113       | 115       | 118       | 120       | 123       | 125       | 128       | 130       | 626              |
| Epithelioid and PD-L1 $\geq$ 1%                      | 48        | 49        | 50        | 51        | 52        | 54        | 55        | 56        | 57        | 273              |
| Epithelioid and PD-L1<1%                             | 62        | 63        | 65        | 66        | 68        | 69        | 70        | 72        | 73        | 352              |
| Non-epithelioid, or epithelioid plus PD-L1 $\geq$ 1% | 128       | 130       | 133       | 136       | 139       | 142       | 145       | 148       | 151       | 723              |

CH Switzerland, MPM malignant pleural mesothelioma, PD-L1 programmed death-ligand 1

# 12 ICER results

**Supplementary Table 13. ICER result table**

| Treatment                                                                                                                               | Cost (CHF) | QALY overall (in PFD state) | LY <sup>1</sup> | ΔCost (CHF) | ΔQALY | ICER <sup>2</sup> (CHF/QALY gained) | LY <sup>3</sup> | Mean duration (in months) <sup>3</sup> |           |          | Costs (in CHF)       |         |       |       |       |        |       |                       |           |  |  |
|-----------------------------------------------------------------------------------------------------------------------------------------|------------|-----------------------------|-----------------|-------------|-------|-------------------------------------|-----------------|----------------------------------------|-----------|----------|----------------------|---------|-------|-------|-------|--------|-------|-----------------------|-----------|--|--|
|                                                                                                                                         |            |                             |                 |             |       |                                     |                 | 1L treatment                           | PFD state | PD state | Drug 1L <sup>4</sup> | Drug 2L | Admin | Visit | Lab   | Image  | AE    | Late-stage palliative | EOL costs |  |  |
| <b>Base case: Patients progress before they die, deterministic analysis</b>                                                             |            |                             |                 |             |       |                                     |                 |                                        |           |          |                      |         |       |       |       |        |       |                       |           |  |  |
| Pem+Platin                                                                                                                              | 76'138     | 1.20 (0.62)                 | 1.71            |             |       |                                     | 1.78            | 2.9                                    | 10.5      | 10.9     | 5'930                | 13'305  | 1'894 | 3'457 | 867   | 22'360 | 677   | 1'238                 | 26'409    |  |  |
| Pem+Platin +Beva                                                                                                                        | 170'108    | 1.56 (1.01)                 | 2.18            | 93'970      | 0.36  | Ext. dominated                      | 2.33            | 17.2                                   | 17.2      | 10.7     | 86'548               | 13'056  | 6'696 | 6'765 | 2'082 | 24'163 | 3'608 | 1'171                 | 26'019    |  |  |
| Nivo+Ipi                                                                                                                                | 184'639    | 1.76 (1.07)                 | 2.43            | 108'501     | 0.56  | <b>192'797</b>                      | 2.61            | 8.2                                    | 19.0      | 12.3     | 114'462              | 3'752   | 5'058 | 5'937 | 1'940 | 25'113 | 1'042 | 1'516                 | 25'818    |  |  |
| <b>Scenario 1: Equal death probability from PFD and PD</b>                                                                              |            |                             |                 |             |       |                                     |                 |                                        |           |          |                      |         |       |       |       |        |       |                       |           |  |  |
| Pem+Platin                                                                                                                              | 71,777     | 1.21 (0.63)                 | 1.72            |             |       |                                     | 1.79            | 2.92                                   | 10.6      | 10.9     | 5'967                | 9'264   | 1'735 | 3'224 | 781   | 22'392 | 677   | 1'337                 | 26'399    |  |  |
| Pem+Platin +Beva                                                                                                                        | 164,268    | 1.59 (1.02)                 | 2.20            | 92'491      | 0.37  | Ext. dominated                      | 2.35            | 17.37                                  | 17.4      | 10.9     | 87'520               | 6'729   | 6'477 | 6'403 | 1'952 | 24'237 | 3'608 | 1'342                 | 26'000    |  |  |
| Nivo+Ipi                                                                                                                                | 175,693    | 1.69 (0.93)                 | 2.32            | 103,916     | 0.48  | <b>216,905</b>                      | 2.49            | 7.84                                   | 16.2      | 13.8     | 109'196              | 2'008   | 4'437 | 4'952 | 1'707 | 24'628 | 1'042 | 1'827                 | 25'896    |  |  |
| <b>Scenario 2: Partitioned Survival Analysis (2L/3L treatment as one-off costs, no treatment on/off specific utilities in PD state)</b> |            |                             |                 |             |       |                                     |                 |                                        |           |          |                      |         |       |       |       |        |       |                       |           |  |  |
| Pem+Platin                                                                                                                              | 76'520     | 1.08 (0.59)                 |                 |             |       |                                     |                 |                                        | 10.1      | 10.9     | 5'953                | 13'722  | 1'922 | 3'531 | 871   | 22'507 | 677   | 1'255                 | 26'082    |  |  |
| Nivo+Ipi                                                                                                                                | 165'727    | 1.58 (0.98)                 |                 | 89'207      | 0.50  | <b>178'094</b>                      |                 |                                        | 17.5      | 11.9     | 99'194               | 2'798   | 4'264 | 4'941 | 1'677 | 24'708 | 1'042 | 1'517                 | 25'586    |  |  |
| Pem+Platin +Beva                                                                                                                        | 167'191    | 1.45 (0.98)                 |                 | 1'464       | -0.13 | Abs. dominated                      |                 |                                        | 16.9      | 10.8     | 84'381               | 13'506  | 6'872 | 5'573 | 2'056 | 24'322 | 3'608 | 1'189                 | 25'685    |  |  |
| <b>Scenario 3: Cisplatin 1L</b>                                                                                                         |            |                             |                 |             |       |                                     |                 |                                        |           |          |                      |         |       |       |       |        |       |                       |           |  |  |
| Pem+Platin                                                                                                                              | 95'208     | 1.20 (0.62)                 | 1.71            |             |       |                                     | 1.78            | 2.9                                    | 10.5      | 10.9     | 27'983               | 13'305  | 654   | 1'526 | 512   | 22'360 | 1'221 | 1'238                 | 26'409    |  |  |
| Nivo+Ipi                                                                                                                                | 184'639    | 1.76 (1.07)                 | 2.43            | 89'431      | 0.56  | <b>158'911</b>                      | 2.61            | 8.2                                    | 19.0      | 12.3     | 114'462              | 3'752   | 5'058 | 5'937 | 1'940 | 25'113 | 1'042 | 1'516                 | 25'818    |  |  |
| Pem+Platin +Beva                                                                                                                        | 186'543    | 1.56 (1.01)                 | 2.18            | 1'904       | -0.20 | Abs. dominated                      | 2.33            | 17.2                                   | 17.2      | 10.7     | 107'650              | 13'056  | 4'333 | 4'819 | 1'725 | 24'163 | 3'608 | 1'171                 | 26'019    |  |  |

| Treatment                                        | Cost (CHF) | QALY overall (in PFD state) | LY <sup>1</sup> | ΔCost (CHF) | ΔQALY | ICER <sup>2</sup> (CHF/QALY gained) | LY <sup>3</sup> | Mean duration (in months) <sup>3</sup> |           |          | Costs (in CHF)       |         |       |       |       |        |       |                       |           |
|--------------------------------------------------|------------|-----------------------------|-----------------|-------------|-------|-------------------------------------|-----------------|----------------------------------------|-----------|----------|----------------------|---------|-------|-------|-------|--------|-------|-----------------------|-----------|
|                                                  |            |                             |                 |             |       |                                     |                 | 1L treatment                           | PFD state | PD state | Drug 1L <sup>4</sup> | Drug 2L | Admin | Visit | Lab   | Image  | AE    | Late-stage palliative | EOL costs |
| <b>Scenario 4: Maximum 1L treatment duration</b> |            |                             |                 |             |       |                                     |                 |                                        |           |          |                      |         |       |       |       |        |       |                       |           |
| Pem+Platin                                       | 79'068     | 1.20 (0.63)                 | 1.71            |             |       |                                     | 1.78            | 3.8                                    | 10.5      | 10.9     | 7'949                | 13'305  | 2'316 | 3'869 | 945   | 22'360 | 677   | 1'238                 | 26'409    |
| Pem+Platin +Beva                                 | 172'975    | 1.56 (1.01)                 | 2.18            | 93'906      | 0.36  | Ext. dominated                      | 2.33            | 17.2                                   | 17.2      | 10.7     | 88'666               | 13'056  | 7'133 | 7'069 | 2'091 | 24'163 | 3'608 | 1'171                 | 26'019    |
| Nivo+Ipi                                         | 220'602    | 1.76 (1.07)                 | 2.43            | 141'534     | 0.56  | <b>251'714</b>                      | 2.61            | 10.7                                   | 19.0      | 12.3     | 148'037              | 3'752   | 6'259 | 6'767 | 2'297 | 25'113 | 1'042 | 1'516                 | 25'818    |
| <b>Scenario 5: Epithelioid subtype</b>           |            |                             |                 |             |       |                                     |                 |                                        |           |          |                      |         |       |       |       |        |       |                       |           |
| Pem+Platin                                       | 78'693     | 1.44 (0.77)                 | 2.05            |             |       |                                     | 2.19            | 2.9                                    | 13.4      | 12.9     | 5'985                | 14'131  | 1'959 | 3'725 | 951   | 23'680 | 677   | 1'472                 | 26'113    |
| <b>Nivo+Ipi</b>                                  | 180'101    | 1.75 (1.01)                 | 2.42            | 101'408     | 0.32  | Ext. dominated                      | 2.60            | 7.9                                    | 17.9      | 13.3     | 110'293              | 3'720   | 4'901 | 5'746 | 1'869 | 25'042 | 1'042 | 1'668                 | 25'820    |
| Pem+Platin +Beva                                 | 215'397    | 1.95 (1.50)                 | 2.72            | 136'704     | 0.51  | <b>266'267</b>                      | 3.03            | 27.7                                   | 27.7      | 8.6      | 125'278              | 13'136  | 8'866 | 9'034 | 2'899 | 26'162 | 3'608 | 922                   | 25'492    |
| <b>Scenario 6: Non-epithelioid subtype</b>       |            |                             |                 |             |       |                                     |                 |                                        |           |          |                      |         |       |       |       |        |       |                       |           |
| Pem+Platin                                       | 70'409     | 0.73 (0.47)                 | 1.05            |             |       |                                     | 1.07            | 2.9                                    | 7.8       | 5.0      | 5'885                | 11'186  | 1'738 | 3'032 | 733   | 19'721 | 677   | 477                   | 26'959    |
| Pem+Platin +Beva                                 | 138'911    | 0.94 (0.74)                 | 1.32            | 68'502      | 0.21  | Ext. dominated                      | 1.37            | 12.6                                   | 12.6      | 3.8      | 64'987               | 10'363  | 5'305 | 5'235 | 1'543 | 20'819 | 3'608 | 322                   | 26'728    |
| Nivo+Ipi                                         | 186'934    | 1.92 (1.38)                 | 2.64            | 116'526     | 1.19  | <b>97'894</b>                       | 2.99            | 8.4                                    | 24.8      | 11.0     | 116'419              | 3'605   | 5'077 | 6'288 | 2'063 | 25'781 | 1'042 | 1'136                 | 25'523    |
| <b>Scenario 7: 10-year time horizon</b>          |            |                             |                 |             |       |                                     |                 |                                        |           |          |                      |         |       |       |       |        |       |                       |           |
| Pem+Platin                                       | 75'926     | 1.19 (0.62)                 | 1.69            |             |       |                                     | 1.76            | 2.9                                    | 10.5      | 10.6     | 5'930                | 13'302  | 1'894 | 3'457 | 867   | 22'305 | 677   | 1'209                 | 26'286    |
| Pem+Platin +Beva                                 | 168'560    | 1.51 (1.00)                 | 2.12            | 92'634      | 0.33  | Ext. dominated                      | 2.23            | 17.0                                   | 17.0      | 9.8      | 85'864               | 12'979  | 6'654 | 6'718 | 2'066 | 23'942 | 3'608 | 1'077                 | 25'652    |
| Nivo+Ipi                                         | 183'668    | 1.69 (1.01)                 | 2.34            | 107'742     | 0.51  | <b>212'460</b>                      | 2.47            | 8.2                                    | 17.3      | 12.3     | 114'462              | 3'726   | 5'052 | 5'847 | 1'914 | 24'790 | 1'042 | 1'514                 | 25'322    |
| <b>Scenario 8: Discount rate 0%</b>              |            |                             |                 |             |       |                                     |                 |                                        |           |          |                      |         |       |       |       |        |       |                       |           |
| Pem+Platin                                       | 77'850     | 1.25 (0.63)                 | 1.78            |             |       |                                     | 1.78            | 2.9                                    | 10.5      | 10.9     | 5'930                | 13'581  | 1'910 | 3'491 | 879   | 22'614 | 677   | 1'342                 | 27'425    |
| Pem+Platin +Beva                                 | 176'217    | 1.66 (1.05)                 | 2.33            | 98'367      | 0.41  | Ext. dominated                      | 2.33            | 17.2                                   | 17.2      | 10.7     | 89'577               | 13'595  | 6'894 | 6'985 | 2'161 | 24'664 | 3'608 | 1'324                 | 27'410    |
| Nivo+Ipi                                         | 187'756    | 1.89 (1.16)                 | 2.61            | 109'906     | 0.64  | <b>170'908</b>                      | 2.61            | 8.2                                    | 19.0      | 12.3     | 114'887              | 3'869   | 5'103 | 6'103 | 1'988 | 25'749 | 1'042 | 1'615                 | 27'399    |



| Treatment                           | Cost (CHF) | QALY overall (in PFD state) | LY <sup>1</sup> | ΔCost (CHF) | ΔQALY | ICER <sup>2</sup> (CHF/QALY gained) | LY <sup>3</sup> | Mean duration (in months) <sup>3</sup> |           |          | Costs (in CHF)       |         |       |       |       |        |       |                       |           |
|-------------------------------------|------------|-----------------------------|-----------------|-------------|-------|-------------------------------------|-----------------|----------------------------------------|-----------|----------|----------------------|---------|-------|-------|-------|--------|-------|-----------------------|-----------|
|                                     |            |                             |                 |             |       |                                     |                 | 1L treatment                           | PFD state | PD state | Drug 1L <sup>4</sup> | Drug 2L | Admin | Visit | Lab   | Image  | AE    | Late-stage palliative | EOL costs |
| <b>Scenario 9: Discount rate 5%</b> |            |                             |                 |             |       |                                     |                 |                                        |           |          |                      |         |       |       |       |        |       |                       |           |
| Pem+Platin                          | 75'115     | 1.17 (0.62)                 | 1.67            |             |       |                                     | 1.78            | 2.9                                    | 10.5      | 10.9     | 5'930                | 13'133  | 1'884 | 3'436 | 861   | 22'212 | 677   | 1'178                 | 25'803    |
| Pem+Platin +Beva                    | 166'568    | 1.50 (0.99)                 | 2.11            | 91'454      | 0.33  | Ext. dominated                      | 2.33            | 17.2                                   | 17.2      | 10.7     | 84'785               | 12'734  | 6'580 | 6'636 | 2'037 | 23'883 | 3'608 | 1'090                 | 25'215    |
| Nivo+Ipi                            | 182'846    | 1.69 (1.02)                 | 2.33            | 107'731     | 0.52  | <b>206'962</b>                      | 2.61            | 8.2                                    | 19.0      | 12.3     | 114'192              | 3'685   | 5'030 | 5'846 | 1'914 | 24'764 | 1'042 | 1'457                 | 24'916    |

<sup>1</sup> discounted

<sup>2</sup> of non-dominated strategies

<sup>3</sup> undiscounted

<sup>4</sup> the scenario with cisplatin contains also inpatient DRG costs (including drug, admin, visit, lab). Imaging always assumed as a separate visit.

Abs absolutely, AE adverse event, CHF Swiss Francs, EOL end of life, ext extendedly, ICER incremental cost-effectiveness ratio, ipi ipilimumab, LCL lower confidence limit, LYs life years, nivo nivolumab, PD progressed disease, PFS progression-free survival, pem pemetrexed, QALY quality-adjusted life-year, UCL upper confidence limit, WTP willingness-to-pay

**Supplementary Table 14.** 5-year budget impact with FU costs of patients from previous years

| Budget impact (costs in CHF)                  | 2022                                                                         | 2023       | 2024       | 2025       | 2026             | Total              |
|-----------------------------------------------|------------------------------------------------------------------------------|------------|------------|------------|------------------|--------------------|
| <b>Applying strictly the Swissmedic label</b> | <b>Non-epithelioid OR epithelioid combined with PD-L1<math>\geq</math>1%</b> |            |            |            |                  |                    |
| Nivolumab+ ipilimumab                         | 12'265'150                                                                   | 16'400'105 | 19'725'062 | 23'039'836 | 24'186'595       | 95'616'747         |
| Pemetrexed +carboplatin                       | 3'104'043                                                                    | 2'174'955  | 1'503'138  | 894'872    | 676'444          | 8'353'452          |
| Pemetrexed +carboplatin + beva                | 7'159'894                                                                    | 5'194'532  | 3'655'992  | 2'243'715  | 1'599'943        | 19'854'077         |
|                                               |                                                                              |            |            |            | Subtotal 1 Costs | 123'824'276        |
|                                               | <b>Epithelioid AND PD-L1&lt;1%</b>                                           |            |            |            |                  |                    |
| Nivolumab+ ipilimumab                         | 0                                                                            | 0          | 0          | 0          | 0                | 0                  |
| Pemetrexed+carboplatin                        | 2'527'822                                                                    | 2'581'167  | 2'635'275  | 2'690'111  | 2'745'660        | 13'180'035         |
| Pemetrexed +carboplatin + beva                | 5'461'297                                                                    | 5'576'572  | 5'693'585  | 5'812'228  | 5'932'417        | 28'476'099         |
|                                               |                                                                              |            |            |            | Subtotal 2 Costs | 41'656'135         |
|                                               |                                                                              |            |            |            | Total costs      | <b>165'480'411</b> |
| <b>MS targeting all patients</b>              | <b>Non-epithelioid and epithelioid (since MS are the same)</b>               |            |            |            |                  |                    |
| Nivolumab+ ipilimumab                         | 18'242'645                                                                   | 24'392'794 | 29'338'189 | 34'268'437 | 35'974'076       | 142'216'141        |
| Pemetrexed +carboplatin                       | 4'616'816                                                                    | 3'234'932  | 2'235'702  | 1'330'994  | 1'006'113        | 12'424'557         |
| Pemetrexed +carboplatin + beva                | 10'649'312                                                                   | 7'726'119  | 5'437'761  | 3'337'204  | 2'379'685        | 29'530'081         |
|                                               |                                                                              |            |            |            | Total costs      | <b>184'170'779</b> |
| <b>No nivolumab+ ipilimumab</b>               | <b>Non-epithelioid and epithelioid (since MS are the same)</b>               |            |            |            |                  |                    |
| Nivolumab+Ipilimumab                          | 0                                                                            | 0          | 0          | 0          | 0                | 0                  |
| Pemetrexed + carboplatin                      | 7'714'630                                                                    | 7'877'434  | 8'042'563  | 8'209'919  | 8'379'448        | 40'223'994         |
| Pemetrexed + platinum + bevacizumab           | 16'667'267                                                                   | 17'019'075 | 17'376'185 | 17'738'270 | 18'105'075       | 86'905'872         |
|                                               |                                                                              |            |            |            | Total costs      | <b>127'129'866</b> |

CHF Swiss Francs, FU follow-up, *ipi* ipilimumab, MS market shares, *nivo* nivolumab, PD-L1 programmed death-ligand 1

**Supplementary Table 15.** 5-year budget impact without FU costs of patients from previous years

| Budget impact (costs in CHF)                  | 2022                                                           | 2023       | 2024       | 2025       | 2026             | Total              |
|-----------------------------------------------|----------------------------------------------------------------|------------|------------|------------|------------------|--------------------|
| <b>Applying strictly the Swissmedic label</b> | <b>Non-epithelioid OR epithelioid combined with PD-L1</b>      |            |            |            |                  |                    |
| Nivolumab+ ipilimumab                         | 12'265'150                                                     | 16'400'105 | 19'725'062 | 23'039'836 | 24'186'595       | 95'616'747         |
| Pemetrexed +carboplatin                       | 1'388'510                                                      | 1'490'149  | 1'215'046  | 795'851    | 676'444          | 5'566'001          |
| Pemetrexed +carboplatin + beva                | 2'697'384                                                      | 3'017'743  | 2'602'931  | 1'841'298  | 1'599'943        | 11'759'299         |
|                                               |                                                                |            |            |            | Subtotal 1 Costs | 112'942'047        |
|                                               | <b>Epithelioid AND PD-L1&lt;1%</b>                             |            |            |            |                  |                    |
| Nivolumab+ ipilimumab                         | 0                                                              | 0          | 0          | 0          | 0                | 0                  |
| Pemetrexed+carboplatin                        | 1'691'747                                                      | 2'247'423  | 2'494'871  | 2'641'853  | 2'745'660        | 11'821'554         |
| Pemetrexed +carboplatin + beva                | 3'286'465                                                      | 4'515'701  | 5'180'370  | 5'616'107  | 5'932'417        | 24'531'061         |
|                                               |                                                                |            |            |            | Subtotal 2 Costs | 36'352'615         |
|                                               |                                                                |            |            |            | Total costs      | <b>149'294'663</b> |
| <b>MS targeting all patients</b>              | <b>Non-epithelioid and epithelioid (since MS are the same)</b> |            |            |            |                  |                    |
| Nivolumab+ ipilimumab                         | 18'242'645                                                     | 24'392'794 | 29'338'189 | 34'268'437 | 35'974'076       | 142'216'141        |
| Pemetrexed +carboplatin                       | 2'065'209                                                      | 2'216'382  | 1'807'206  | 1'183'714  | 1'006'113        | 8'278'625          |
| Pemetrexed +carboplatin + beva                | 4'011'970                                                      | 4'488'459  | 3'871'485  | 2'738'666  | 2'379'685        | 17'490'264         |
|                                               |                                                                |            |            |            | Total costs      | <b>167'985'030</b> |
| <b>No nivolumab+ ipilimumab</b>               | <b>Non-epithelioid and epithelioid (since MS are the same)</b> |            |            |            |                  |                    |
| Nivolumab+Ipilimumab                          | 0                                                              | 0          | 0          | 0          | 0                | 0                  |
| Pemetrexed + carboplatin                      | 5'163'023                                                      | 6'858'884  | 7'614'068  | 8'062'640  | 8'379'448        | 36'078'062         |
| Pemetrexed + platinum + bevacizumab           | 10'029'925                                                     | 13'781'415 | 15'809'909 | 17'139'732 | 18'105'075       | 74'866'055         |
|                                               |                                                                |            |            |            | Total costs      | <b>110'944'118</b> |

CHF Swiss Francs, FU follow-up, *ipi* ipilimumab, MS market shares, *nivo* nivolumab, PD-L1 programmed death-ligand 1

# 13 Scatterplot results

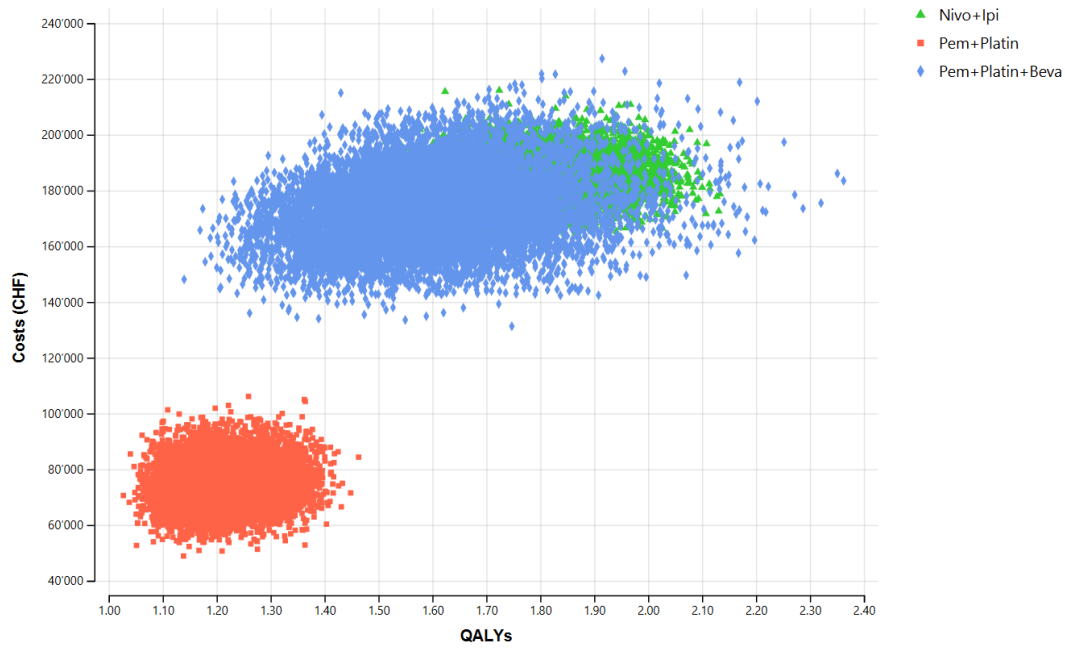

**Supplementary Fig. 34 Cost-effectiveness plane (TreeAge output)**

*Beva* bevacizumab, *CHF* Swiss Francs, *ipi* ipilimumab, *nivo* nivolumab, *pem* pemetrexed, *QALY* quality-adjusted life-year

# 14 EVPI

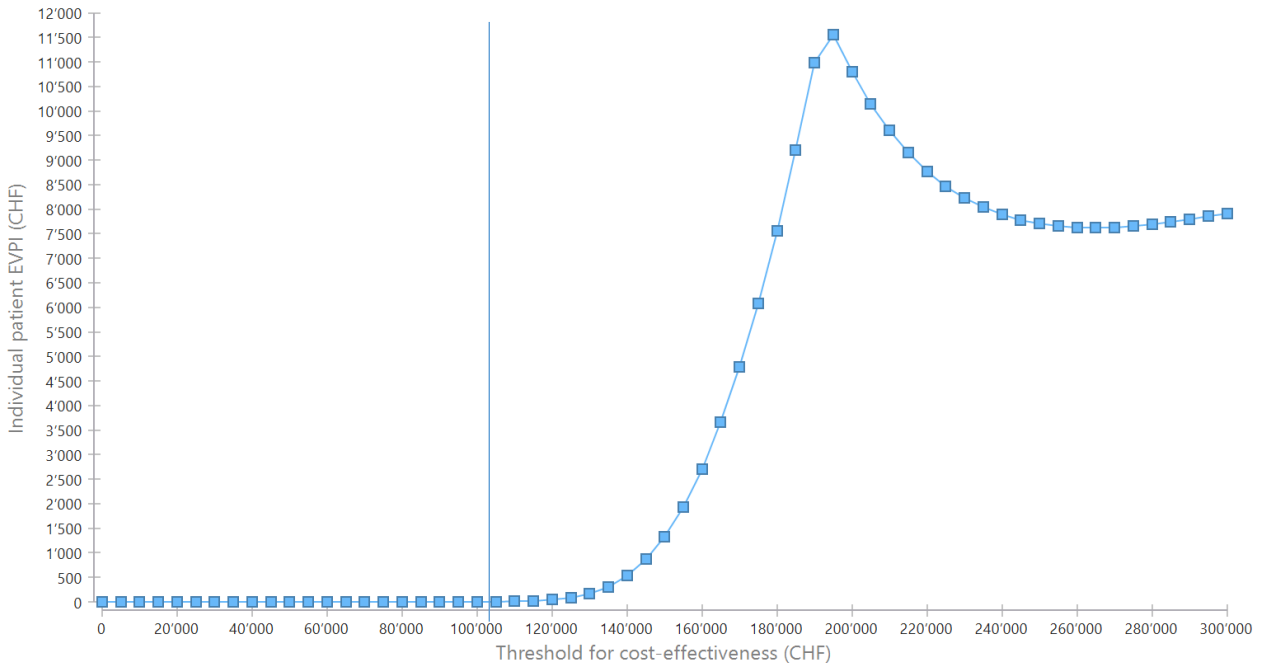

**Supplementary Fig. 35** EVPI for an individual patient. *EVPI* expected value of perfect information, *WTP* willingness-to-pay

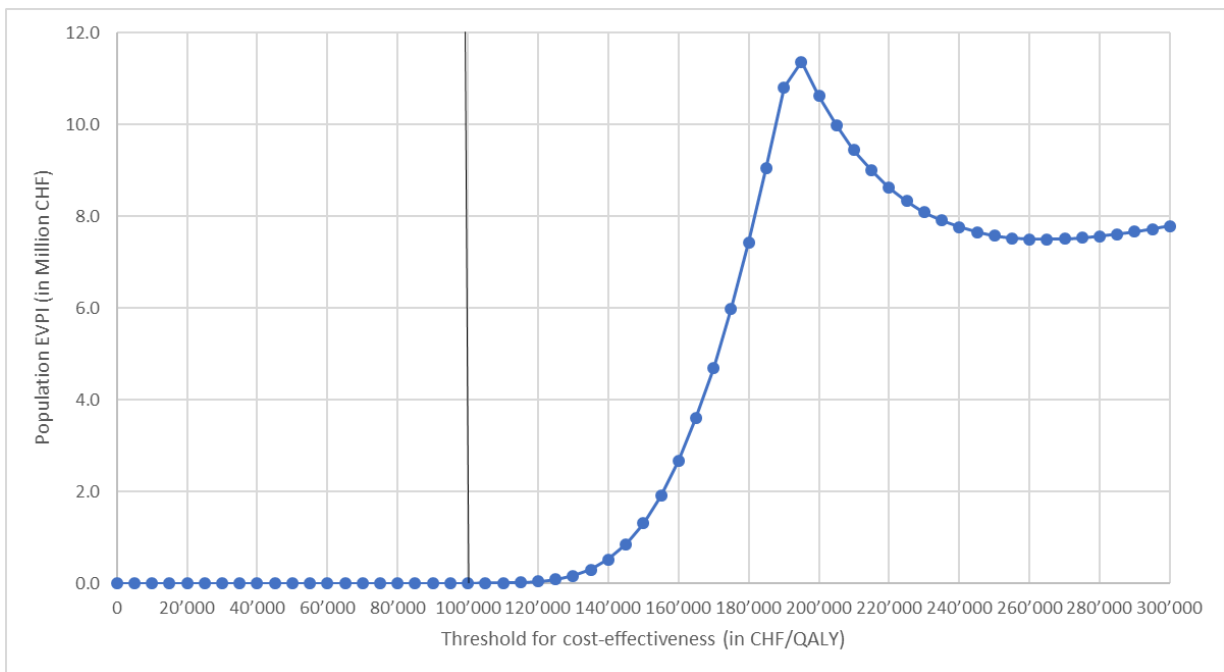

**Supplementary Fig. 36** EVPI for the Swiss population. *CHF* Swiss Francs, *EVPI* expected value of perfect information, *QALY* Quality-adjusted life-year

Note: Population EVPI = Individual EVPI \*  $\sum_{t=1}^T \frac{Incidence_t}{(1+discount\ rate)^t}$ , with T=effective lifetime (5 years assumed)

# 15 References

1. Briggs AC, Kark; Sculpher, Mark. Decision modelling for health economic evaluation 2006.
2. Pahuta MA, Werier J, Wai EK, Patchell RA, Coyle D. A technique for approximating transition rates from published survival analyses. *Cost Effectiveness and Resource Allocation*. 2019 2019/07/01;17(1):12.
3. Zalcman G, Oulkhair Y, Cornelissen R, Greillier L, Cid JR, Mazieres J, et al. LBA71 First-line nivolumab (NIVO) plus ipilimumab (IPI) vs chemotherapy (chemo) in patients (pts) with unresectable malignant pleural mesothelioma (uMPM): 4-year update from CheckMate 743. *Annals of Oncology*. 2022;33:S1438-S9.
4. NICE. Committee Papers 2022. Nivolumab with ipilimumab for untreated unresectable malignant pleural mesothelioma [ID1609]. 2022.
5. NICE. Committee papers 2021. Nivolumab with ipilimumab for untreated unresectable malignant pleural mesothelioma [ID1609]. 2021.
6. Peters S, Scherpereel A, Cornelissen R, Oulkhair Y, Greillier L, Kaplan MA, et al. First-line nivolumab plus ipilimumab versus chemotherapy in patients with unresectable malignant pleural mesothelioma: 3-year outcomes from CheckMate 743. *Ann Oncol*. 2022 May;33(5):488-99.
7. NICE. Final appraisal document (FAD). Nivolumab with ipilimumab for untreated unresectable malignant pleural mesothelioma. 2022.
8. Baas P, Scherpereel A, Nowak AK, Fujimoto N, Peters S, Tsao AS, et al. First-line nivolumab plus ipilimumab in unresectable malignant pleural mesothelioma (CheckMate 743): a multicentre, randomised, open-label, phase 3 trial. *The Lancet*. 2021 2021/01/30/;397(10272):375-86.
9. Popat S, Curioni-Fontecedro A, Dafni U, Shah R, O'Brien M, Pope A, et al. A multicentre randomised phase III trial comparing pembrolizumab versus single-agent chemotherapy for advanced pre-treated malignant pleural mesothelioma: the European Thoracic Oncology Platform (ETOP 9-15) PROMISE-meso trial. *Annals of Oncology*. 2020;31(12):1734-45.
10. Scherpereel A, Mazieres J, Greillier L, Lantuejoul S, Dô P, Bylicki O, et al. Nivolumab or nivolumab plus ipilimumab in patients with relapsed malignant pleural mesothelioma (IFCT-1501 MAPS2): a multicentre, open-label, randomised, non-comparative, phase 2 trial. *Lancet Oncol*. 2019 Feb;20(2):239-53.
11. Federal Office of Public Health. Swiss Specialty List ("Schweizer Spezialitätenliste"). Available from: <http://www.spezialitaetenliste.ch>ShowPreparations.aspx?searchType=SUBSTANCE>
12. Online Definitionshandbuch SwissDRG 9.0. 16.11.2022]; Available from: <https://manual.swissdrg.org/de/11.3/supplements>
13. TARMED Online Browser Tarifversion 1.09. 1.2.2021]; Available from: <https://www.tarmed-browser.ch/de>
14. Analysenliste (Version 1.August 2022). Swiss Federal Office of Public Health. 2022; Available from: <https://www.bag.admin.ch/bag/de/home/versicherungen/krankenversicherung/krankenversicherung-leistungen-tarife/Analysenliste.html>
15. Zalcman G, Mazieres J, Margery J, Greillier L, Audigier-Valette C, Moro-Sibilot D, et al. Bevacizumab for newly diagnosed pleural mesothelioma in the Mesothelioma Avastin Cisplatin Pemetrexed Study (MAPS): a randomised, controlled, open-label, phase 3 trial. *The Lancet*. 2016;387(10026):1405-14.
16. Swiss Federal Statistical Office. Population size and change in Switzerland in 2021: definitive figures. Available from: <https://www.bfs.admin.ch/bfs/en/home/statistics/population.gnpdetail.2022-0467.html>
17. Swiss Federal Statistical Office. Key population figures, 1950-2021. Available from: <https://www.bfs.admin.ch/bfs/en/home/statistics/population.assetdetail.23328853.html>
18. National Institute for Cancer Epidemiology and Registration (NICER). Available from: <https://www.nicer.org/en/home>
19. Suva. Unfallstatistik UVG 2020. 2020; Available from: [https://www.unfallstatistik.ch/d/publik/unfstat/unfstat\\_d.htm](https://www.unfallstatistik.ch/d/publik/unfstat/unfstat_d.htm)

20. Cedrés S, Ponce-Aix S, Zugazagoitia J, Sansano I, Enguita A, Navarro-Mendivil A, et al. Analysis of expression of programmed cell death 1 ligand 1 (PD-L1) in malignant pleural mesothelioma (MPM). PLoS One. 2015;10(3):e0121071.
21. Blutspende SRK Zürich. 31.8.2022]; Available from: [https://www.blutspendezurich.ch/fileadmin/pdf/Preislisten/Preisliste\\_2022\\_1.2.2022\\_fv\\_WEB.pdf](https://www.blutspendezurich.ch/fileadmin/pdf/Preislisten/Preisliste_2022_1.2.2022_fv_WEB.pdf)
22. 2021 UNlimited world trade union GmbH. 31.8.2022]; Available from: <https://shop-unlimited.com/b-braun-surecan-safety-ii-caresite-g20-25-mm.html>
